# Supplementary material for: Identification of natural compounds as SARS-CoV-2 inhibitors via molecular docking and molecular dynamic simulation
Source: Front Microbiol. 2023 Feb 1;13:1095068. doi: 10.3389/fmicb.2022.1095068 (PMC9930647; doi:10.3389/fmicb.2022.1095068)
Supplement: Supplementary file 5 [file Table_1.xlsx]

## Sheet: Sheet1
Table S1 The Affinity Score of Compounds with S Protein of Lambda Strain
Num	MOL_ID	Affinity (kcal/MOL)	Molecule_name	PubChem_Cid
1	MOL000753	-9.7	clematichinenoside AR2	0
2	MOL006876	-9.5	atratoglaucoside,b	0
3	MOL007238	-9.5	physalin b	0
4	MOL006874	-9.4	atratoglaucoside,a	0
5	MOL003009	-9.3	Ochnaflavone	5492110
6	MOL003351	-9.3	cyclopseudo-hypericin	0
7	MOL005678	-9.3	periplocoside J	0
8	MOL006757	-9.3	Bryonolic acid	472768
9	MOL007353	-9.3	solamargine	0
10	MOL003278	-9.2	salaspermic acid	0
11	MOL005671	-9.2	periplocoside C	0
12	MOL009468	-9.2	β1-solamargine	0
13	MOL009472	-9.2	26-O-β-D-glucopyranosyl-nuatigenin-3-O-α-L-rhamnopyranosyl(1→2)-β-D-glucopyranoside	0
14	MOL011100	-9.2	bisindigotin	0
15	MOL002067	-9.1	hypericin	0
16	MOL002659	-9.1	kihadanin A	0
17	MOL004500	-9.1	Markogenin-3-O-beta-D-glucopyranosyl-(1-2)-beta-D-galactopyranoside	0
18	MOL005459	-9.1	Diosgenin-3-O-beta-D-glucopyranoside	0
19	MOL006855	-9.1	solamargine	0
20	MOL006895	-9.1	glaucoside,d	0
21	MOL007062	-9.1	neo-przewaquinone a	0
22	MOL009804	-9.1	prosapogenin A of dioscin	0
23	MOL010726	-9.1	Casuarictin	0
24	MOL012074	-9.1	neocimiside	0
25	MOL012732	-9.1	mulberrofuran Q	0
26	MOL002505	-9	C10230	0
27	MOL004509	-9	Timosaponin A III	0
28	MOL005675	-9	periplocoside E_qt	0
29	MOL006920	-9	glaucogenin,c,3-o-beta-d-cymaropyranosyl-(1-4)-alpha-l-diginopyranosyl-(1-4)-,beta-d-thevetopyranoside	0
30	MOL009110	-9	heterophylliin D	0
31	MOL012727	-9	mulberrofuran K	0
32	MOL013303	-9	ergocristine	0
33	MOL000508	-8.9	Friedelin	91472
34	MOL002037	-8.9	Amentoflavone	5281600
35	MOL002260	-8.9	Procyanidin B-5,3'-O-gallate	0
36	MOL002517	-8.9	Zingiberoside A3	0
37	MOL003197	-8.9	orthosphenic acid	0
38	MOL003350	-8.9	Protohypericin	0
39	MOL005403	-8.9	oleanane	0
40	MOL005505	-8.9	Cornusiin B	0
41	MOL005630	-8.9	cynatratoside B	0
42	MOL005665	-8.9	Periplocoside M	0
43	MOL006680	-8.9	celogentin,c	0
44	MOL006902	-8.9	cynanoside,p3	0
45	MOL006913	-8.9	cynanversicoside g	0
46	MOL006981	-8.9	Trilobine	0
47	MOL007296	-8.9	glucose ,d-glucose	0
48	MOL008582	-8.9	trillin	0
49	MOL009478	-8.9	deacylbrownioside	0
50	MOL009597	-8.9	solanidine 3-O-α-L-rhamnopyranosyl-(1-2)-[β-D-glucopyranosyl-(1-4)]-β-D-glucopyranoside	0
51	MOL010612	-8.9	9-(3,5-dihydroxyphenoxy)-2-[9-(3,5-dihydroxyphenoxy)-1,3,6,8-tetrahydroxyoxanthren-2-yl]oxanthrene-1,3,6,8-tetrol	3008867
52	MOL001963	-8.8	Anemoside B4	0
53	MOL002020	-8.8	Inokiflavone	5281627
54	MOL003265	-8.8	Wilforlide B	0
55	MOL003654	-8.8	kaikasaponin III_qt	0
56	MOL004494	-8.8	Desglucolanatigonin II	0
57	MOL005067	-8.8	furosin	0
58	MOL005628	-8.8	cynapanoside C	0
59	MOL006888	-8.8	cynanoside,e	0
60	MOL006922	-8.8	glaucoside,c	0
61	MOL009098	-8.8	casuariin	0
62	MOL010399	-8.8	(3beta,14alpha)-3-o-beta-d-glucopyranosyl-(1-2)-[beta-d-xylopyranosyl-(1-3)]-beta-d-glucopyranosyl-(1-4)-beta-d-galacopyranosyl-yamogenin	0
63	MOL011124	-8.8	Wikstrosin	0
64	MOL011327	-8.8	Podocarpusflavone A	5320644
65	MOL012711	-8.8	moracenin C	0
66	MOL012728	-8.8	mulberrofuran M	0
67	MOL013230	-8.8	Casuariin	0
68	MOL000137	-8.7	Diosgenin acetate	0
69	MOL000754	-8.7	clematichinenoside AR2_qt	0
70	MOL002245	-8.7	Chrysophanol-8-O-beta-D-(6'-O-galloyl)-glucopyranoside	5315852
71	MOL002292	-8.7	Sennoside D	46173829
72	MOL002293	-8.7	Sennoside D_qt	0
73	MOL002368	-8.7	Sennoside A	73111
74	MOL002369	-8.7	Dihydroxydianthrone	92826
75	MOL003432	-8.7	vomicine	0
76	MOL004701	-8.7	saikosaponin c	0
77	MOL004805	-8.7	(2S)-2-[4-hydroxy-3-(3-methylbut-2-enyl)phenyl]-8,8-dimethyl-2,3-dihydropyrano[2,3-f]chromen-4-one	197678
78	MOL005155	-8.7	ginsenoside Ro_qt	7055468
79	MOL005456	-8.7	Deltoside	0
80	MOL005637	-8.7	Aristoloterpenate	0
81	MOL005936	-8.7	kaikasaponinIII_qt	0
82	MOL006546	-8.7	latifoloside D	0
83	MOL006785	-8.7	emblicanin A	0
84	MOL006891	-8.7	cynanoside,g	0
85	MOL008305	-8.7	Ardisiacrispin A	0
86	MOL008837	-8.7	(2S)-2-[(2S,3S)-4-[3-[(1R)-1-(3,4-dihydroxybenzyl)-2-hydroxy-2-keto-ethoxy]-3-keto-propyl]-2-(3,4-dihydroxyphenyl)-7-hydroxy-2,3-dihydrobenzofuran-3-carbonyl]oxy-3-(3,4-dihydroxyphenyl)propionic acid	5319055
87	MOL009107	-8.7	glansrin B	0
88	MOL009108	-8.7	glansrin C	0
89	MOL009146	-8.7	punicalagin	0
90	MOL009576	-8.7	ebeiedinone	0
91	MOL011515	-8.7	Daturameteloside J	0
92	MOL000425	-8.6	asernestioside A	0
93	MOL002265	-8.6	Rheidin B	0
94	MOL003349	-8.6	Protopseudohypericin	0
95	MOL003487	-8.6	D-Friedoolean-14-en-3-one	92785
96	MOL004511	-8.6	Timosaponin A-1	0
97	MOL004703	-8.6	saikosaponin e	0
98	MOL005064	-8.6	Dehydrogeraniin	0
99	MOL005506	-8.6	Cornusiin C	0
100	MOL005669	-8.6	periplocoside B	0
	MOL005986	-8.6	Cryptomerin B	5316145
	MOL006554	-8.6	Taraxerol	92097
	MOL006890	-8.6	cynanoside,f	0
	MOL006921	-8.6	glaucogenin,c,3-o-beta-d-thevetopyranoside	0
	MOL008242	-8.6	mulberrofuran K	0
	MOL009002	-8.6	Cordylagenin	0
	MOL009101	-8.6	euprostin A	0
	MOL009106	-8.6	glansrin A	0
	MOL009562	-8.6	Ohioensin-A	0
	MOL009783	-8.6	diosbuibin I	0
	MOL010194	-8.6	ussuriendinone	0
	MOL010391	-8.6	25(R,S)spirost-5-en-3beta-ol-3-o-beta-d-glucopyranosyl-(1-2)-[beta-d-xylylpyranylosyl-(1-3)]-beta-d-glucopyranosyl-(1-4)-beta-d-galactopyranose	0
	MOL010937	-8.6	ardisicrenoside G	0
	MOL011017	-8.6	ardisiamamilloside H	0
	MOL011389	-8.6	chikusetsusaponin Ⅳa	0
	MOL012047	-8.6	cimicifoetiside b	0
	MOL012731	-8.6	Mulberrofuran P	0
	MOL012929	-8.6	glaucoside C	0
	MOL013352	-8.6	Obacunone	0
	MOL000559	-8.5	Repandusinic acid A	0
	MOL002214	-8.5	96990-18-0	176596
	MOL002266	-8.5	Rheidin C	0
	MOL002353	-8.5	Curine	0
	MOL002509	-8.5	Ginkgetin	5271805
	MOL003346	-8.5	Psuedohypericin	0
	MOL003887	-8.5	Gracillin	0
	MOL005085	-8.5	Chelidimerine	0
	MOL005413	-8.5	Clavatol	0
	MOL005457	-8.5	Deltoside_qt	0
	MOL005543	-8.5	camptothin B	0
	MOL005626	-8.5	cynapanoside B	0
	MOL005670	-8.5	periplocoside B_qt	0
	MOL005674	-8.5	periplocoside E	0
	MOL005984	-8.5	Isocryptomerin	5318537
	MOL005985	-8.5	8-[5-(5,7-dihydroxy-4-keto-chromen-2-yl)-2-hydroxy-phenyl]-5-hydroxy-2-(4-hydroxyphenyl)-7-methoxy-chromone	5494868
	MOL006393	-8.5	epiberberine	0
	MOL006496	-8.5	toralactone,9-o-beta-d-gentiobioside	0
	MOL006707	-8.5	3-epi-β-amyrin	0
	MOL007237	-8.5	physalin o	0
	MOL007311	-8.5	asiaticoside-b	0
	MOL007599	-8.5	Friedelanol	101341
	MOL007872	-8.5	quercetin-7-O-rhamnoside	0
	MOL008306	-8.5	Ardisiacrispin A_qt	0
	MOL008579	-8.5	(2aS,2'R,4R,5'S,6R,6aR,6bS,8aS,8bS,9S,11aR,12aR,12bR)-4-(((2R,3R,4S,5R,6R)-3,4-dihydroxy-6-(hydroxymethyl)-5-(((2R,3R,4S,5S,6R)-3,4,5-trihydroxy-6-(hydroxymethyl)tetrahydro-2H-pyran-2-yl)oxy)tetrahydro-2H-pyran-2-yl)oxy)-5',6,8a,9-tetramethylicosahydro	0
	MOL008682	-8.5	alpha-Solamarine	0
	MOL008737	-8.5	solasonine	0
	MOL008807	-8.5	NSC-93674	0
	MOL009112	-8.5	isostrictinin	0
	MOL009573	-8.5	cycloposine	25078000
	MOL010039	-8.5	arnidiol	0
	MOL010125	-8.5	esgoside	0
	MOL010177	-8.5	ebeiedine	0
	MOL010178	-8.5	heilonine	0
	MOL010193	-8.5	ussuriendine	0
	MOL011013	-8.5	ardisiamamilloside C	0
	MOL011024	-8.5	ardisianoside C	0
	MOL011030	-8.5	ardisianoside G	0
	MOL011222	-8.5	Ganoderic acid V1	0
	MOL011550	-8.5	sciadopitysin	5281696
	MOL011596	-8.5	Luteolin-3′-glucoside	0
	MOL011620	-8.5	Eriocitrin	83489
	MOL011985	-8.5	12beta-hydroxylcimigenol,3-o-alpha-l-arabinopyranoside	0
	MOL012020	-8.5	7,8-Didehydro-27-deoxyactein	0
	MOL012062	-8.5	cimigenol	0
	MOL012202	-8.5	3-cinnamoyl sumaresinolic acid	0
	MOL000132	-8.4	(5beta,25S)-Spirostan-3beta,15alpha,23alpha-diol-3-O-D-glucopyranosyl-(1-2)-beta-D-galactopyranoside	0
	MOL000427	-8.4	asernestioside B	0
	MOL001810	-8.4	6-(3-oxoindolin-2-ylidene)indolo[2,1-b]quinazolin-12-one	3035728
	MOL002158	-8.4	xiongterpene	0
	MOL002291	-8.4	1-O-Galloylpedunculagin	0
	MOL002315	-8.4	Thladioside H1	0
	MOL002433	-8.4	(3R,8S,9R,10R,13R,14S,17R)-3-hydroxy-4,4,9,13,14-pentamethyl-17-[(E,2R)-6-methyl-7-[(2R,3R,4S,5S,6R)-3,4,5-trihydroxy-6-[[(2R,3R,4S,5S,6R)-3,4,5-trihydroxy-6-(hydroxymethyl)oxan-2-yl]oxymethyl]oxan-2-yl]oxyhept-5-en-2-yl]-1,2,3,7,8,10,12,15,16,17-decahydr	6324887
	MOL003223	-8.4	Tingenone	441687
	MOL003313	-8.4	suspensaside A	0
	MOL003381	-8.4	Ecliptasaponin B	0
	MOL003424	-8.4	Pseudocarpaine	0
	MOL003639	-8.4	Soyasaponin A4	0
	MOL004415	-8.4	Epimedoside E	0
	MOL004888	-8.4	licorice-saponin F3	0
	MOL005013	-8.4	18α-hydroxyglycyrrhetic acid	0
	MOL005236	-8.4	gibberellin	0
	MOL005325	-8.4	ginsenoside Ro	0
	MOL005555	-8.4	isoterchebin	0
	MOL005593	-8.4	ClematosideA'	0
	MOL005594	-8.4	ClematosideA'_qt	0
	MOL005681	-8.4	periplocoside K_qt	0
	MOL005778	-8.4	blestrianol C	14863077
	MOL005782	-8.4	blestrin D	0
	MOL006455	-8.4	1-[(beta-D-Glucopyranosyl-(1-3)-O-beta-D-glucopyranosyl-(1-6)-O-beta-D-glucopyranosyl)oxy]-8-hydroxy-3-methyl-9,10-anthraquinone	0
	MOL006495	-8.4	toralactone,9-o-[beta-d-glucopyranosyl-(1-3)-o-beta-d-glucopyranosyl-(1-6)-o-beta-dglucopyranoside]	0
	MOL006816	-8.4	putranjivain A	0
	MOL007019	-8.4	Eugeniin	0
	MOL007302	-8.4	madecassoside	0
	MOL008501	-8.4	Gitonin	0
	MOL008559	-8.4	(2aR,2'R,4R,6aR,6bS,8aS,8bR,11aS,12aR,12bR)-4-((S)-2-(2,6-dimethylphenyl)propoxy)-5',5',6a,8a-tetramethyl-8-methylenedocosahydro-1H-spiro[pentaleno[2,1-a]phenanthrene-10,2'-pyran]	0
	MOL008584	-8.4	beta-Sitosterol-beta-D-glucopyranoside_qt	0
	MOL008597	-8.4	balsaminone B	0
	MOL008907	-8.4	segetalin A	0
	MOL009068	-8.4	Kaempferol 7-alpha-L-arabinoside	0
	MOL009109	-8.4	glansrin D	0
	MOL009177	-8.4	ephedrannin B	0
	MOL009182	-8.4	mahuannin F	0
	MOL009469	-8.4	solasodine-3-O-α-L-rhamnopyranosyl-(1→2)-O-[β-D-glucopyranosyl-(1→4)]-β-D-glucopyranoside	0
	MOL009805	-8.4	taccaoside	0
	MOL009956	-8.4	Gypenoside XVII	0
	MOL010191	-8.4	sipeimine-3β-D-glucoside	0
	MOL010192	-8.4	sipeimine-3β-D-glucoside_qt	0
	MOL010351	-8.4	Mukurozi-saponin E1	0
	MOL010490	-8.4	m-Bis(m-phenoxyphenoxy)benzene	75565
	MOL010712	-8.4	strictinin	0
	MOL011458	-8.4	3-O-beta-D-Xylopyranosyl-(1-6)-beta-D-glucopyranosyl-(1-6)-beta-D-glucopyranosyl oleanolic acid 28-O-beta-D-glucopyranosyl ester	0
	MOL011496	-8.4	(6R)-6-[(1R)-1-[(8S,9S,10R,13S,14S,17R)-10,13-dimethyl-1-oxo-4,7,8,9,11,12,14,15,16,17-decahydrocyclopenta[a]phenanthren-17-yl]-2-hydroxyethyl]-4-methyl-3-[[(2R,3R,4S,5S,6R)-3,4,5-trihydroxy-6-(hydroxymethyl)oxan-2-yl]oxymethyl]-5,6-dihydropyran-2-one	14428176
	MOL011569	-8.4	5 -Methoxy-bilobetin	5319411
	MOL011584	-8.4	(2R,3R,4R)-4-[(2R,3R)-2-(3,4-dihydroxyphenyl)-3,5,7-trihydroxychroman-8-yl]-2-(3,4,5-trihydroxyphenyl)chroman-3,5,7-triol	13831064
	MOL011619	-8.4	1-[2-(3,4- dihydroxyphenyl)-1-methoxycarbonyl]ethoxycarbonyl-2-(3,4- dihydroxyphenyl)-3-[2-(3,4- dihydroxyphenyl)-1-carboxy] ethoxycarbonyl-7,8- dihydroxy-1,2-dihydronaphthalene	0
	MOL012045	-8.4	cimicifoetiside a	0
	MOL012060	-8.4	cimigenol-3-O-B-D-xylopyranoside	0
	MOL012281	-8.4	3-O-[α-L-rhamnopyranosyl-(1→3)β-D-glucopyranosiduronic acid]-28-O-β-D-glucopyranosyl oleanolic acid	0
	MOL012510	-8.4	Chikusetsusaponin V butyl ester	0
	MOL012692	-8.4	kuwanon D	0
	MOL012734	-8.4	mulberroside C	0
	MOL012783	-8.4	quercetin-3-O-(2',6'-digalloyl)-β-D-glucoside	0
	MOL012798	-8.4	Kaempferol-3-O-6'-trans-coumaroyl-β-D-glucoside	12775852
	MOL012847	-8.4	Chikusetsusaponin Ib	0
	MOL013368	-8.4	Insularine	0
	MOL000062	-8.3	biatractylolide	0
	MOL000140	-8.3	DIOSGENIN,DEHYDRO	0
	MOL000456	-8.3	Phaseolin	0
	MOL001528	-8.3	jujuboside B	0
	MOL001874	-8.3	isoarborinol	12305182
	MOL002041	-8.3	C-Curarine	0
	MOL002274	-8.3	(9S)-9-[(9R)-2-carboxy-4,5-dihydroxy-10-oxo-9H-anthracen-9-yl]-4,5-dihydroxy-10-oxo-9H-anthracene-2-carboxylic acid	10459879
	MOL002278	-8.3	Sennoside E	0
	MOL002587	-8.3	Euphorbetin	5317297
	MOL002693	-8.3	nicotiflorin	5318767
	MOL002912	-8.3	Dihydrobaicalin	0
	MOL003186	-8.3	tripterine	122724
	MOL003438	-8.3	4-hydroxystrychnine	21680048
	MOL003514	-8.3	dianoside G	0
	MOL003671	-8.3	3,5-dihydroxy-2-(4-hydroxyphenyl)-8,8-dimethyl-10-(3-methylbut-2-enyl)pyrano[5,6-g]chromen-4-one	16215899
	MOL003854	-8.3	Kwangsine	5318907
	MOL003909	-8.3	evobioside	0
	MOL004146	-8.3	curculigosaponin C	0
	MOL004353	-8.3	quercetin-3-O-β-D-galactoside-7-O-β-D-glucoside	0
	MOL004401	-8.3	bilobetin	5315459
	MOL004521	-8.3	xilingsaponin A	0
	MOL004529	-8.3	Timosaponin A-III	0
	MOL004566	-8.3	pseudoprotodioscin	0
	MOL004583	-8.3	11α-methoxysaikosaponin f	0
	MOL004635	-8.3	saikosaponin a	0
	MOL004693	-8.3	saikosaponin b1	0
	MOL004852	-8.3	7-hydroxy-2-[4-hydroxy-3-(3-methylbut-2-enyl)phenyl]-6-(3-methylbut-2-enyl)chromone	11349817
	MOL004868	-8.3	Gancaonin Q	480802
	MOL005041	-8.3	elgnica	0
	MOL005077	-8.3	kaempferitrin	21159160
	MOL005231	-8.3	isoeuphorbetin	71438018
	MOL005685	-8.3	periplocoside O	0
	MOL005751	-8.3	(6aS,6aS,6bR,8aR,12aR,14aR,14bS)-4,4,6a,6b,8a,11,11,14a-octamethyl-2,6,6a,7,8,9,10,12,12a,13,14,14b-dodecahydro-1H-picen-3-one	10071029
	MOL005773	-8.3	blespirol	0
	MOL005870	-8.3	sanguiin H-2	0
	MOL006323	-8.3	geraniin	0
	MOL006341	-8.3	agrimonine	0
	MOL006518	-8.3	Kudinoside E	0
	MOL006520	-8.3	Kudinoside F_qt	0
	MOL006540	-8.3	ilekudinoside G_qt	0
	MOL006545	-8.3	latifoloside C	0
	MOL006650	-8.3	(-)-Maackiain-3-O-glucosyl-6'-O-malonate	0
	MOL006652	-8.3	trifolrhizin	0
	MOL006804	-8.3	phyllaemblicin C	0
	MOL006813	-8.3	prodelphinidin B-2 3-O-gallate	0
	MOL006893	-8.3	cynanoside,i	0
	MOL006894	-8.3	glaucoside,d_qt	0
	MOL006915	-8.3	cynanversicoside g_qt 2	0
	MOL007175	-8.3	karounidiol 3-o-benzoate	0
	MOL007182	-8.3	5-hydroxy-2-[4-hydroxy-3-[(2S,3R,4S,5S,6R)-3,4,5-trihydroxy-6-(hydroxymethyl)oxan-2-yl]oxyphenyl]-7-methoxychromen-4-one	10479460
	MOL007328	-8.3	asiaticoside	0
	MOL007812	-8.3	2'-O-beta-Glucopyranosyl-5,7,4',5'-tetrahydroxyflavanone	174157
	MOL007894	-8.3	glutenol	0
	MOL008015	-8.3	paryriogenin C	0
	MOL008020	-8.3	paryriogenin I	0
	MOL008506	-8.3	Tigogenone	0
	MOL008522	-8.3	sarsasapogeni	0
	MOL008543	-8.3	Desace	28620
	MOL008782	-8.3	2-northalmine	0
	MOL008894	-8.3	pseudolarolide A	0
	MOL009168	-8.3	isoliensinine	5274591
	MOL009272	-8.3	Punicalin	0
	MOL009476	-8.3	brownioside	0
	MOL009583	-8.3	STOCK1N-49993	0
	MOL009803	-8.3	neodiosbulbin	0
	MOL010041	-8.3	D:C-Friedours-7-en-3beta-ol (8CI)	111220
	MOL010126	-8.3	grosvenorine	0
	MOL010146	-8.3	mogroside V	0
	MOL010190	-8.3	sevcoridinine	0
	MOL010354	-8.3	mukurozisaponin X	0
	MOL010355	-8.3	mukurozisaponin Y1	0
	MOL010839	-8.3	lappadilactone	0
	MOL010895	-8.3	Casuariin	0
	MOL011073	-8.3	Scillaren A	0
	MOL011470	-8.3	12-Deoxywithastramonolide	0
	MOL011476	-8.3	3-O-β-D-glueopyranosyl	0
	MOL011487	-8.3	Datuarmeteloside B_qt	0
	MOL011494	-8.3	Daturametelin A	0
	MOL011509	-8.3	Daturameteloside G	0
	MOL011828	-8.3	robinin	0
	MOL012083	-8.3	12beta-hydroxycimigenol	0
	MOL012279	-8.3	3-O-[α-L-rhamnopyranosyl-(1→3)-(n-butyl-β-D-glucopyranosiduronate}-28-O-β-D-glucopyranosyl oleanolic acid	0
	MOL012287	-8.3	capitasterone	0
	MOL012296	-8.3	precyasterone	0
	MOL012330	-8.3	ginsenoside R0	0
	MOL012461	-8.3	28-norolean-17-en-3-ol	0
	MOL012466	-8.3	3-O-(β-D-glucuronic acid)-oleanolic acid-28-O-(β-D-glucose)	0
	MOL012700	-8.3	(2S)-2-[3-[(1S,5R,6S)-6-(2,4-dihydroxybenzoyl)-5-(2,4-dihydroxyphenyl)-3-methyl-1-cyclohex-2-enyl]-2,4-dihydroxyphenyl]-5,7-dihydroxychroman-4-one	184877
	MOL012730	-8.3	Mulberrofuran O	0
	MOL012749	-8.3	sanggenone B	0
	MOL012931	-8.3	Glaucoside H	0
	MOL000761	-8.2	huzhangoside B	0
	MOL001259	-8.2	(3R,4R,4aR,6aR,6bS,8aR,11R,12S,12aR,14aR,14bS)-3-hydroxy-4,6a,6b,8a,11,12,14b-heptamethyl-14-oxo-1,2,3,4a,5,6,7,8,9,10,11,12,12a,14a-tetradecahydropicene-4-carboxylic acid	9847548
	MOL001350	-8.2	GA30	0
	MOL001358	-8.2	gibberellin 7	0
	MOL001361	-8.2	GA87	0
	MOL001514	-8.2	gomphrenin V	0
	MOL001970	-8.2	Pulchinenoside C	0
	MOL001990	-8.2	Anemoside B	71307558
	MOL002272	-8.2	Sennidin C	0
	MOL002296	-8.2	Daucosterol	0
	MOL002580	-8.2	cholesta-6,22,24-trien,4,4-dimethyl	0
	MOL002596	-8.2	NSC 403164	101257
	MOL002600	-8.2	Glycerite	0
	MOL003037	-8.2	hydnocarpinhydnocarpinhydnocarpin	0
	MOL003041	-8.2	macranthoidin A	0
	MOL003209	-8.2	Celallocinnine	0
	MOL003218	-8.2	Neouralenol	5320118
	MOL003409	-8.2	Colubrinoside	0
	MOL003831	-8.2	esculentoside Q_qt	0
	MOL003958	-8.2	Evodiamine	0
	MOL004005	-8.2	6alpha-Acetoxy-5-epilimonin	0
	MOL004385	-8.2	Yinyanghuo D	5315396
	MOL004437	-8.2	Lespedin	5486199
	MOL004504	-8.2	Sarsasapogenin 3-O-4G-rhamnosylsophoroside	0
	MOL004637	-8.2	Saikosaponin D	0
	MOL004886	-8.2	licorice-saponin C2	0
	MOL004892	-8.2	licorice-saponin G2	0
	MOL004949	-8.2	Isolicoflavonol	5318585
	MOL004987	-8.2	11-deoxyglycyrrhetic acid	12305517
	MOL005002	-8.2	beta-Glycyrrhetinic acid	73398
	MOL005005	-8.2	Glyasperin A	5481963
	MOL005460	-8.2	ophipogonin D_qt	0
	MOL005668	-8.2	periplocoside C_qt	0
	MOL005759	-8.2	2,7-dihydroxy-4-methoxyphenanthrene-2,7-O-diglucoside	0
	MOL005781	-8.2	blestrin C	0
	MOL005832	-8.2	Arborinol	0
	MOL005943	-8.2	kaempferol-3,7-di-O-glucoside	0
	MOL005998	-8.2	2'-O-polygalacin D2	0
	MOL006016	-8.2	3'-O-polygalacin D	0
	MOL006668	-8.2	Neobudofficide	0
	MOL006679	-8.2	celogentin,b	0
	MOL006719	-8.2	celosin D1	0
	MOL006773	-8.2	sericoside	0
	MOL006784	-8.2	elaeocarpusin	0
	MOL006787	-8.2	furosin	0
	MOL006818	-8.2	uteolin-4'-O-neohesperiodoside	0
	MOL006848	-8.2	1,2,6-tri-o-galloyl-β-d-glucopyranoside	0
	MOL007451	-8.2	silydianin	0
	MOL007616	-8.2	4',5-dihydroxy flavonoids-7-o-α- glucosyl (1.2)- β-d- rhamnoseside	0
	MOL007831	-8.2	crenatoside_qt	0
	MOL007983	-8.2	SAUCHINONE	0
	MOL008012	-8.2	papyrioside L-Ⅱd	0
	MOL008157	-8.2	isoviolanthin	0
	MOL008397	-8.2	Daturilin	0
	MOL008502	-8.2	C08899	0
	MOL008509	-8.2	Vitexin-2-O-p-coumarate	0
	MOL008518	-8.2	lilagenin	0
	MOL008525	-8.2	Yuccagenin	0
	MOL008578	-8.2	(2S,2aS,2'R,4S,5'R,6aR,6bS,8aS,8bS,9S,11aR,12aS,12bR)-5',6a,8a,9-tetramethyldocosahydrospiro[naphtho[2',1':4,5]indeno[2,1-b]furan-10,2'-pyran]-2,4-diol	0
	MOL008626	-8.2	pedunculagin	0
	MOL009074	-8.2	Chitranone	633072
	MOL009127	-8.2	1-desgalloylrugosin F	0
	MOL009291	-8.2	cannabiscitrin	0
	MOL009454	-8.2	3-O-beta-D-Glucopyranosyl betulinic acid-28-O-beta-D-glucopyranosyl-(1-6)-beta-D-glucopyranoside	0
	MOL009572	-8.2	Chuanbeinone	0
	MOL009590	-8.2	Korsevinine	0
	MOL009712	-8.2	Genkdaphin	5317554
	MOL009937	-8.2	Gypenoside XI	0
	MOL010019	-8.2	Phi-Taraxasterol	12305110
	MOL010040	-8.2	bauer-7-ene-3beta-16alpha-diol	0
	MOL010109	-8.2	siraitic acid D	0
	MOL010179	-8.2	cevane	0
	MOL010180	-8.2	pingbeidinoside	0
	MOL010185	-8.2	pingbeisaponin	0
	MOL010186	-8.2	pingbeisaponin_qt	0
	MOL010254	-8.2	hippophaenin A	0
	MOL010271	-8.2	propelargonidin	0
	MOL010352	-8.2	mukurozisaponin X_qt	0
	MOL010404	-8.2	polygosides A	0
	MOL010405	-8.2	polygosides B	0
	MOL010446	-8.2	aster saponin F	0
	MOL010461	-8.2	epifriedelanol	12309540
	MOL010714	-8.2	tellimagrandinII	0
	MOL011473	-8.2	7一O一α-L一ramnopyranosyl一KaempferoL	0
	MOL011486	-8.2	Datuarmeteloside B	0
	MOL011489	-8.2	Datuarmeteloside C_qt	0
	MOL011537	-8.2	Withametelin E	0
	MOL011763	-8.2	luteolin-7-o-beta-d-galactopyranoside	0
	MOL011962	-8.2	6'-Feruloylnodakenin	6439317
	MOL012009	-8.2	25-o-acetylcimigenol-3-o-beta-d-galactoyranoside_qt	0
	MOL012011	-8.2	25-o-acetylcimigenol-3-o-beta-d-glc(1-2)beta-d-xylopyranoside_qt	0
	MOL012038	-8.2	Heracleifolinoside F	0
	MOL012065	-8.2	cimilactone b	0
	MOL012075	-8.2	neocimiside_qt	0
	MOL012273	-8.2	2,3-isopropylidene isocyasterone	0
	MOL012283	-8.2	3-O-[β-D-glucopyranosyl-(1→2)-α-L-rhamnopyranosyl-(1→3)β-D-glucopyranosiduronic acid]-28-O-β-D-glucopyranosyl oleanolic acid	0
	MOL012338	-8.2	ginsenoside Rs1	0
	MOL012464	-8.2	3-O-(β-D-glucose)-oleanolic acid-28-O-(β-D-glucose)	0
	MOL012473	-8.2	achybidensaponin,ii	0
	MOL012478	-8.2	achyranthoside Ⅲ	0
	MOL012506	-8.2	chikusetsusaponin Ⅳ	0
	MOL012528	-8.2	oleanolic acid 3-O-[β-D-glucuronopyranoside-6-O-methyl ester]-28-O-β-D-glucopyranoside	0
	MOL012745	-8.2	sanggenol A	15233693
	MOL012787	-8.2	quercetin-7-O-β-D-gentiobioside	0
	MOL012961	-8.2	jujuboside A_qt	0
	MOL012969	-8.2	2α-hydroxyoleanolic acid	0
	MOL012988	-8.2	Jujuboside A1	0
	MOL013175	-8.2	Mukurozisaponin Y	0
	MOL013310	-8.2	Robinetinidol-(4alpha->8)-catechin-(6->4alpha)-robinetinidol	442689
	MOL000134	-8.1	Delta3,5-Deoxytigogenin	0
	MOL000152	-8.1	Acacetin-7-glucurono-(1-2)-glucuronide	0
	MOL000413	-8.1	astrachrysoside A	0
	MOL000419	-8.1	astrasieversianin XV	0
	MOL000450	-8.1	(6aR,11aR)-2,10-bis(3-methylbut-2-enyl)-6a,11a-dihydro-6H-benzofurano[3,2-c]chromene-3,9-diol	10408212
	MOL000463	-8.1	16844-71-6	119242
	MOL000547	-8.1	BB_NC-0149	0
	MOL000742	-8.1	Cularicine	0
	MOL000743	-8.1	Cyclomulberrochromene	0
	MOL001352	-8.1	GA54	0
	MOL001353	-8.1	GA60	0
	MOL001527	-8.1	jujuboside A_qt	0
	MOL001790	-8.1	Linarin	5317025
	MOL001921	-8.1	Lactiflorin	0
	MOL001982	-8.1	disacoside B_qt	40469778
	MOL002019	-8.1	Cupressuflavone	5281609
	MOL002068	-8.1	isorhamnetin-3,7-diglucoside	0
	MOL002069	-8.1	Isorhamnetin-7-O-beta-D-glucopyranoside	0
	MOL002252	-8.1	palmidin B	0
	MOL002253	-8.1	Palmidin C	44567180
	MOL002276	-8.1	Sennoside E_qt	0
	MOL002290	-8.1	Sennoside B	91440
	MOL002327	-8.1	Fenfangjine D	0
	MOL002518	-8.1	Zingiberoside A3_qt	0
	MOL002716	-8.1	qt_carthamin	0
	MOL003176	-8.1	b-AMYRIN	0
	MOL003190	-8.1	WILFORLIDE B	0
	MOL003195	-8.1	tripterygone	0
	MOL003198	-8.1	5 alpha-Benzoyl-4 alpha-hydroxy-1 beta,8 alpha-dinicotinoyl-dihydro-agarofuran	0
	MOL003254	-8.1	Triptotriterpenoidel lactone A	0
	MOL003337	-8.1	Forsythoside F	0
	MOL003497	-8.1	Pristimerin	159516
	MOL003665	-8.1	soyasapogenol A	0
	MOL003778	-8.1	pjs-1_qt	0
	MOL003830	-8.1	esculentoside Q	0
	MOL003847	-8.1	Inophyllum E	0
	MOL003892	-8.1	Sarsapogenine	0
	MOL003898	-8.1	Aspafilioside A	0
	MOL003942	-8.1	Rutaevine	0
	MOL004137	-8.1	yuccagenin	0
	MOL004227	-8.1	Sanguidimerine	0
	MOL004369	-8.1	quercetin-3-rhamnooside	40486293
	MOL004397	-8.1	baohuoside Ⅵ	0
	MOL004440	-8.1	Peimisine	161294
	MOL004495	-8.1	tigogenin	0
	MOL004510	-8.1	Timosaponin A III_qt	0
	MOL004513	-8.1	Timosaponin B III	0
	MOL004539	-8.1	Anemarsaponin C	0
	MOL004595	-8.1	3',6'-O,O-diacetylsaikosaponin b2	0
	MOL004659	-8.1	chikusaikoside II	0
	MOL004696	-8.1	saikosaponin b2_qt	0
	MOL004821	-8.1	kanzonols X	0
	MOL004909	-8.1	glabrolide	0
	MOL005018	-8.1	Xambioona	0
	MOL005093	-8.1	Diosmin	5281613
	MOL005238	-8.1	Gibberellin A8	0
	MOL005504	-8.1	Cornusiin A	0
	MOL005548	-8.1	cornusiin E	0
	MOL005673	-8.1	periplocoside D_qt	0
	MOL005679	-8.1	periplocoside J_qt	0
	MOL005694	-8.1	Multiflorin A	5319939
	MOL005779	-8.1	blestrin A	0
	MOL005861	-8.1	3-oxo-19α-hydroxyurs-12-en-28-oic acid	0
	MOL005872	-8.1	sanguisorbic acid dilactone	0
	MOL005920	-8.1	quercetin 7-O-β-D-glucoside	0
	MOL006042	-8.1	methyl 3-O-β-laminaribiosyl polygalacate	0
	MOL006055	-8.1	platyconate A	0
	MOL006067	-8.1	Polygalacin D	0
	MOL006324	-8.1	α-amyrenonol	0
	MOL006524	-8.1	Ligurobustoside N	0
	MOL006531	-8.1	[(2S,3R,4S,5S,6R)-3,4,5-trihydroxy-6-(hydroxymethyl)oxan-2-yl] (4aS,6aR,6aS,6bR,8aR,10S,12aR,14bS)-10-hydroxy-2,2,6a,6b,9,9,12a-heptamethyl-1,3,4,5,6,6a,7,8,8a,10,11,12,13,14b-tetradecahydropicene-4a-carboxylate	14189384
	MOL006619	-8.1	kushenol J	0
	MOL006622	-8.1	kushenol O	0
	MOL006642	-8.1	sophoraflavoside II	0
	MOL006643	-8.1	sophoraflavosideⅢ_qt	0
	MOL006651	-8.1	Trifolirhizin	0
	MOL006798	-8.1	pedunculagin	0
	MOL006807	-8.1	Phyllanemblinin B	0
	MOL006872	-8.1	atratoglaucoside b	0
	MOL006889	-8.1	cynanoside,f_qt	0
	MOL006903	-8.1	cynanoside,p4	0
	MOL007172	-8.1	7-oxo-dihydrokaro-unidiol	0
	MOL007257	-8.1	ilexsideii	0
	MOL007291	-8.1	Hecogenin	0
	MOL007321	-8.1	[(2S,3R,4S,5S,6R)-6-[[(2R,3R,4R,5S,6R)-3,4-dihydroxy-6-(hydroxymethyl)-5-[(2S,3R,4R,5R,6R)-3,4,5-trihydroxy-6-methyloxan-2-yl]oxyoxan-2-yl]oxymethyl]-3,4,5-trihydroxyoxan-2-yl] (1S,2R,4aS,6aR,6aS,6bR,8aR,9R,10R,11R,12aR,14bR)-10,11-dihydroxy-9-(hydroxymet	24721205
	MOL007361	-8.1	desgalactotigonin	0
	MOL007418	-8.1	eupatorin	0
	MOL007485	-8.1	(2S,3S,4S,5R,6R)-6-[[(3S,4aR,6aR,6bS,8aS,12aS,14aR,14bR)-4,4,6a,6b,11,11,14b-heptamethyl-8a-[oxo-[[(2S,3R,4S,5S,6R)-3,4,5-trihydroxy-6-(hydroxymethyl)-2-tetrahydropyranyl]oxy]methyl]-1,2,3,4a,5,6,7,8,9,10,12,12a,14,14a-tetradecahydropicen-3-yl]oxy]-3,4-di	11815492
	MOL007576	-8.1	6-[5-(5,7-dihydroxy-4-keto-chromen-2-yl)-2-methoxy-phenyl]-5,7-dihydroxy-2-(4-hydroxyphenyl)chromone	11757331
	MOL007676	-8.1	(4R,4aR,6aR,6aS,6bR,8aR,10S,12aS)-4,10-dihydroxy-2,2,4a,6a,6b,9,9,12a-octamethyl-3,4,5,6,6a,7,8,8a,10,11,12,14-dodecahydro-1H-picen-13-one	21594179
	MOL007776	-8.1	clemontanoside B	0
	MOL008278	-8.1	4-chloro-N-[1-methyl-5-[[1-methyl-5-[[1-methyl-5-(2-morpholinoethylcarbamoyl)pyrrol-3-yl]carbamoyl]pyrrol-3-yl]carbamoyl]pyrrol-3-yl]-5-[2-(2-pyridyl)ethylamino]isothiazole-3-carboxamide	488866
	MOL008461	-8.1	Strictosamide	0
	MOL008573	-8.1	(2aS,2'R,4R,5'R,6aS,6bS,8aS,8bS,9S,11aR,12aR,12bR)-4-(((2R,3R,4S,5S,6R)-5-(((2R,3R,4S,5S,6R)-4,5-dihydroxy-6-(hydroxymethyl)-3-(((2S,3R,4R,5S,6R)-3,4,5-trihydroxy-6-(hydroxymethyl)tetrahydro-2H-pyran-2-yl)oxy)tetrahydro-2H-pyran-2-yl)oxy)-3-hydroxy-6-(h	0
	MOL008834	-8.1	Bilicerdin	0
	MOL008847	-8.1	Isoergotamine	0
	MOL009003	-8.1	(2S,3R,4S,5S,6R)-2-[4-[(1R,3aR,4S,6aS)-6a-hydroxy-4-[3-methoxy-4-[(2S,3R,4S,5S,6R)-3,4,5-trihydroxy-6-(hydroxymethyl)oxan-2-yl]oxyphenyl]-3,3a,4,6-tetrahydro-1H-furo[4,3-c]furan-1-yl]-2-methoxyphenoxy]-6-(hydroxymethyl)oxane-3,4,5-triol	21633110
	MOL009062	-8.1	Aureusidin-6-glucoside	5321164
	MOL009070	-8.1	Luteolin 7-O-glucuronide	5280601
	MOL009144	-8.1	chebulinic acid	0
	MOL009211	-8.1	kadsulactone	0
	MOL009276	-8.1	granatin B	0
	MOL009307	-8.1	Naringenin-4'-glucoside-7-neohesperidoside	0
	MOL009372	-8.1	Tubocurarine	0
	MOL009462	-8.1	ophipogonin D	0
	MOL009464	-8.1	26-O-β-D-glucopyranosyl-3β,26-dihydroxy-5-cholesten-16,22-dioxo-3-O-α-L-rhamnopyranosyl-(1→2)-β-D-glucopyranoside	0
	MOL009474	-8.1	26-O-β-D-glucopyranosylnuatigenin-3-O-α-L-rhamnopyranosyl(1→2)-o-[β-D-glucopyranosyl(1→4)]-β-D-glucopyranoside	0
	MOL009475	-8.1	26-O-β-D-glucopyranosylnuatigenin-3-O-α-L-rhamnopyranosyl(1→2)-o-[β-D-glucopyranosyl(1→4)]-β-D-glucopyranoside_qt	0
	MOL009591	-8.1	Korsine	0
	MOL009664	-8.1	Physalin A	0
	MOL010169	-8.1	maoyancaosu	0
	MOL010195	-8.1	ussurienine	0
	MOL010397	-8.1	(3beta,14alpha)-3-o-beta-d-glucopyranosyl-(1-2)-[beta-d-xylopyranosyl-(1-3)]-beta-d-glucopyranosyl(1-4)-beta-d-galacopyranosyl-14-hydroxy-(25S)-spirost-5-ene	0
	MOL010739	-8.1	rugosin B	0
	MOL010889	-8.1	5-desgalloylstachyurin	0
	MOL010894	-8.1	castalagin	0
	MOL010952	-8.1	triterpenoid glycoside 1	0
	MOL011027	-8.1	ardisianoside E	0
	MOL011438	-8.1	pseudoginsenoside RT5_qt	15886258
	MOL011439	-8.1	(2R,3R,4S,5S,6R)-2-[[(3S,5R,6S,8R,9R,10R,12R,13R,14R,17S)-3,12-dihydroxy-17-[(2S,5R)-5-(2-hydroxypropan-2-yl)-2-methyloxolan-2-yl]-4,4,8,10,14-pentamethyl-2,3,5,6,7,9,11,12,13,15,16,17-dodecahydro-1H-cyclopenta[a]phenanthren-6-yl]oxy]-6-(hydroxymethyl)oxa	21633075
	MOL011484	-8.1	Datuarmeteloside A	0
	MOL011511	-8.1	Daturameteloside H	0
	MOL011538	-8.1	Withametelin G	0
	MOL011541	-8.1	withanoside Ⅲ	0
	MOL011810	-8.1	Faradiol alpha-epoxide	0
	MOL011820	-8.1	(3S,4aR,6aR,6aR,6bR,8S,8aS,12S,12aR,14aR,14bR)-4,4,6a,6b,8a,11,12,14b-octamethyl-2,3,4a,5,6,6a,7,8,9,12,12a,13,14,14a-tetradecahydro-1H-picene-3,8-diol	9846222
	MOL011956	-8.1	kaempferol-3-glucoside-7-diglucoside	0
	MOL011990	-8.1	23-epi-26-deoxyactein	0
	MOL012021	-8.1	7,8-Didehydro-27-deoxyactein_qt	0
	MOL012262	-8.1	ombuoside	0
	MOL012509	-8.1	Chikusetsusaponin IVa methyl ester	637855
	MOL012527	-8.1	oleanolic acid 3-O-[β-D-glucuronopyranoside-6-O-ethyl ester]-28-O-β-D-glucopyranoside	0
	MOL012531	-8.1	pjs-1	0
	MOL012565	-8.1	3-0-trans-cafeoyhormentic acid	0
	MOL012566	-8.1	3-0-trans-p-coumarylrotundic acid	0
	MOL012579	-8.1	(4R,8R,9R)-4,8-bis(3,4-dihydroxyphenyl)-5,9-dihydroxy-4,8,9,10-tetrahydro-3H-pyrano[6,5-h]chromen-2-one	21676383
	MOL012598	-8.1	kaempferol-3-O-α-L-(2〞,4〞-di-E-feruloyl)-rhamnoside	0
	MOL012726	-8.1	mulberrofuran G	0
	MOL012755	-8.1	sanggenone H	0
	MOL012785	-8.1	quercetin-3-O-6'-trans-coumaroyl-β-D-glucoside	0
	MOL012795	-8.1	Kaempferol-3-O-(2',6'-digalloyl)-β-D-glucoside	0
	MOL012917	-8.1	daurinoline	12309092
	MOL012942	-8.1	Tannin	0
	MOL000009	-8	luteolin-7-o-glucoside	5280637
	MOL000407	-8	astragalosideⅣ	0
	MOL000426	-8	asernestioside A_qt	0
	MOL000531	-8	5-hydroxy-2-(4-hydroxyphenyl)-7-[(2S,3R,4S,5S,6R)-3,4,5-trihydroxy-6-[[(2R,3R,4S,5S,6R)-3,4,5-trihydroxy-6-methylol-tetrahydropyran-2-yl]oxymethyl]tetrahydropyran-2-yl]oxy-chromone	10841200
	MOL000546	-8	diosgenin	0
	MOL000762	-8	Palmidin A	0
	MOL001022	-8	11α-hydroxypregna-4,17(20)-trans-diene-3,16-dione	0
	MOL001130	-8	Fellavine	193876
	MOL001253	-8	11-keto-α-amyrenone	0
	MOL001255	-8	Boswellic acid	168928
	MOL001347	-8	GA16	0
	MOL001354	-8	GA61	0
	MOL001405	-8	crocin I	0
	MOL001521	-8	ceanothic acid	0
	MOL001526	-8	jujuboside A	0
	MOL001875	-8	isochlorogenic,acid	0
	MOL002005	-8	Hinokinin	442879
	MOL002226	-8	lyciumin A	0
	MOL002275	-8	Sennoside C	0
	MOL002283	-8	[(2R,3S,4S,5R,6S)-6-[4-[(Z)-2-(3,5-dihydroxyphenyl)ethenyl]phenoxy]-3,4,5-trihydroxyoxan-2-yl]methyl 3,4,5-trihydroxybenzoate	11800639
	MOL002511	-8	Isoginkgetin	5318569
	MOL002606	-8	Hopene	92155
	MOL002625	-8	Kaempfe-rol-3,7-dirhamnoside	0
	MOL002803	-8	Arvenin I	6441104
	MOL002822	-8	Mingjinianuronide A	0
	MOL002946	-8	2,3-didehydro-2',7-dihydroxy-4'-methoxy-3-(2',7-dihydroxy-4'-methoxyisoflavan-5'-yl)flavone	0
	MOL002947	-8	2,3-didehydro-2',7-dihydroxy-4'-methoxy-3(2',7-dihydroxy-4'-methoxyisoflavan-6-yl)flavan	0
	MOL003076	-8	3,5-di-O-caffeoylquinic acid methyl ester	0
	MOL003130	-8	madreselvin A	0
	MOL003382	-8	Ecliptasaponin B_qt	0
	MOL003842	-8	Albanol	0
	MOL003885	-8	Yamogenin	0
	MOL004072	-8	Rouhuoside	0
	MOL004399	-8	Baohuoside VI	11972471
	MOL004413	-8	epimedoside C	0
	MOL004430	-8	icariside I	0
	MOL004431	-8	icariside II	0
	MOL004452	-8	Peiminoside	0
	MOL004506	-8	Smilagenin-3-O[beta-D-glucopyranosyl-(1-2)]-beta-D-mannopyranoside_qt	0
	MOL004537	-8	Anemarsaponin B	0
	MOL004561	-8	Sudan III	0
	MOL004593	-8	3'-O-Acetylsaikosaponin D	0
	MOL004638	-8	Saikosaponin K	0
	MOL004640	-8	Saikosaponin f	0
	MOL004673	-8	kaempferitrin	0
	MOL004675	-8	kaempferol-7-O-rhamnoside	0
	MOL004695	-8	saikosaponin b2	0
	MOL004876	-8	Glycyram	14982
	MOL004962	-8	24-Hydroxy-11-deoxyglycyrrhetic acid	0
	MOL004999	-8	Artonin E	5481962
	MOL005011	-8	Kanzonol Z	0
	MOL005211	-8	Olitoriside	0
	MOL005237	-8	gibberellin A5	0
	MOL005304	-8	7alpha-L-Rhamnosyl-6-methoxylutcolin	0
	MOL005330	-8	Ginsenoside-Ra3	0
	MOL005465	-8	AIDS180907	5495928
	MOL005581	-8	genkwadaphnin	0
	MOL005624	-8	cynapanoside A	0
	MOL005689	-8	periplocymarin	0
	MOL005865	-8	(+)-Catechin-7-gallate	471393
	MOL006021	-8	16-oxo-platycodin D	0
	MOL006030	-8	Flavoplatycoside	0
	MOL006140	-8	1,3-dihydroxy-2-hydroxymthylanthraquinone-3-O-xylosyl(1→6)-glucoside	0
	MOL006173	-8	Rubiatriol	183864
	MOL006271	-8	trichirubine,b	0
	MOL006367	-8	2-(p-hydroxyphenyl)-ethanol-1-o-beta-d-apiofuranosyl,(1-6)-o-beta-d-glucopyranoside_qt	0
	MOL006418	-8	phellodensin-c	0
	MOL006499	-8	27-cis-p-coumaroyloxyursolic acid	0
	MOL006519	-8	Kudinoside F	0
	MOL006532	-8	(2S,3S,4S,5R,6R)-6-[[(3S,4aR,6aR,6bS,8aS,11R,12R,12aS,14aR,14bR)-12-hydroxy-4,4,6a,6b,11,12,14b-heptamethyl-8a-[oxo-[[(2S,3R,4S,5S,6R)-3,4,5-trihydroxy-6-(hydroxymethyl)-2-tetrahydropyranyl]oxy]methyl]-1,2,3,4a,5,6,7,8,9,10,11,12a,14,14a-tetradecahydropic	21635822
	MOL006539	-8	ilekudinoside G	0
	MOL006685	-8	mimengoside B	0
	MOL006786	-8	emblicanin B	0
	MOL006806	-8	Phyllanemblinin A	0
	MOL006854	-8	solasonine_qt	0
	MOL006857	-8	tomatidenol	0
	MOL006858	-8	Soladulcidin	0
	MOL006860	-8	15a- hydroxysoladulcidine	0
	MOL006904	-8	cynanoside,p5	0
	MOL006973	-8	cepharanthine	0
	MOL007003	-8	benzoyl paeoniflorin	0
	MOL007060	-8	Lithospermic acid B	6451084
	MOL007103	-8	dimetbyl lithosper-mate b	0
	MOL007137	-8	salvianolic acid c	0
	MOL007141	-8	salvianolic acid g	0
	MOL007158	-8	Spirostan-3-ol, (3beta,5alpha,25S)-	0
	MOL007324	-8	madecassoside	45356919
	MOL007360	-8	quercetin-3-gentiobioside	0
	MOL007452	-8	silychristin	0
	MOL007454	-8	silymonin	0
	MOL007476	-8	ginsenoside rb1	0
	MOL007571	-8	5-hydroxy-8-[2-hydroxy-5-(5-hydroxy-4-keto-7-methoxy-chromen-2-yl)phenyl]-2-(4-hydroxyphenyl)-7-methoxy-chromone	13871759
	MOL007611	-8	3',5-dihydroxy-4'-methoxyflavone 7-o-α- rhamnosesyl(1.6)-β-d-glucoside	0
	MOL007637	-8	macrostemonoside d_qt	0
	MOL007755	-8	decumbeside B	0
	MOL007774	-8	clemontanoside A	0
	MOL007860	-8	quercetin-7-rhamnoside	0
	MOL007926	-8	[(2S,3R,4S,5S,6R)-3,4,5-trihydroxy-6-(hydroxymethyl)oxan-2-yl] (1R,2R,4aS,6aR,6aS,6bR,8aR,10R,11R,12aR,14bS)-1,10,11-trihydroxy-1,2,6a,6b,9,9,12a-heptamethyl-2,3,4,5,6,6a,7,8,8a,10,11,12,13,14b-tetradecahydropicene-4a-carboxylate	21122581
	MOL008010	-8	papyrioside L-Ⅱc	0
	MOL008021	-8	paryriogenin J	0
	MOL008243	-8	mulberroside C	0
	MOL008483	-8	vincoside lactam	0
	MOL008560	-8	(2aS,2'R,5'R,6aS,6bS,8aS,8bR,9S,11aR,12aR,12bR)-5',6a,8a,9-tetramethylicosahydro-1H-spiro[pentaleno[2,1-a]phenanthrene-10,2'-pyran]-8(2H)-one	0
	MOL008571	-8	(2'R,5'R,6aS,6bS,8aR,8bS,11aR,12aR,12bR)-5',6a,8a-trimethyl-1,3',4',5',6,6a,6b,6',7,8a,8b,9,11a,12,12a,12b-hexadecahydrospiro[naphtho[2',1':4,5]indeno[2,1-b]furan-10,2'-pyran]-4,8(2H,5H)-dione	0
	MOL008580	-8	spirostanol	0
	MOL008581	-8	tigogenin	0
	MOL008736	-8	solanine_qt	0
	MOL008909	-8	(3R,6R,9R,12S,15R,21S)-3,9-bis(benzyl)-15-isobutyl-6-methyl-12-methylol-1,4,7,10,13,16,19-heptazabicyclo[19.3.0]tetracosane-2,5,8,11,14,17,20-heptone	21458012
	MOL008910	-8	vaccarin	0
	MOL009024	-8	Chlorogenin	0
	MOL009103	-8	[(2R,3S,4S,5R,6S)-4-hydroxy-5,6-bis[(3,4,5-trihydroxybenzoyl)oxy]-2-[(3,4,5-trihydroxybenzoyl)oxymethyl]oxan-3-yl] 3,4,5-trihydroxybenzoate	11297287
	MOL009180	-8	Mahuannin D	0
	MOL009225	-8	schisanlactone F	0
	MOL009303	-8	Cuscutoside B	0
	MOL009399	-8	Maistemonine	0
	MOL009473	-8	26-O-β-D-glucopyranosyl-nuatigenin-3-O-α-L-rhamnopyranosyl(1→2)-β-D-glucopyranoside_qt	0
	MOL009582	-8	Sipeimine	0
	MOL009665	-8	Physcion-8-O-beta-D-gentiobioside	5320543
	MOL009743	-8	Soyasaponin A1	0
	MOL009748	-8	Soyasaponin A6	0
	MOL009884	-8	gynsenoside Rd_qt	0
	MOL009925	-8	Gypenoside LXXII	0
	MOL010049	-8	faradiol	0
	MOL010074	-8	11-oxoymogroside Ⅲ	17752183
	MOL010181	-8	pingbeimine C	0
	MOL010375	-8	Yibeinoside B	0
	MOL010623	-8	FRIEDELIN	0
	MOL010642	-8	Ohchinolide C	0
	MOL010713	-8	tellimagrandinI	0
	MOL010811	-8	Akeboside sth	0
	MOL010980	-8	triterpenoid glycoside 3	0
	MOL011015	-8	ardisiamamilloside F	0
	MOL011025	-8	ardisianoside D	0
	MOL011036	-8	ardisianoside J	0
	MOL011098	-8	9alpha,13alpha-dihydroxylisopropylidenylisatisine,a	0
	MOL011408	-8	ginsenoside- Rh1_qt	0
	MOL011485	-8	Datuarmeteloside A_qt	0
	MOL011499	-8	Daturameteline A	0
	MOL011516	-8	Daturameteloside J_qt	0
	MOL011609	-8	1,3-bis[2-(3,4-dihydroxyphenyl)-1-methoxycarbonyl]ethoxy carbonyl-2-(3,4-dihydroxyphenyl)-7,8-dihydroxy-1,2-dihydronaphthalene	0
	MOL011682	-8	N-[(2R,3S)-7-(2-acetamidoethyl)-2-(3,4-dihydroxyphenyl)-2,3-dihydro-1,4-benzodioxin-3-yl]acetamide	10643865
	MOL011832	-8	1-carboxy-2-(3,4-dihydroxyphenyl)erhyl-(E)-3-{3-[1-carboxy-2-(3,4-dihydroxyphenyl)ethoxycarboayl]-7-hydroxy-2-(3,4-dihydroxyphenyl)-benzofuran-5-yl} propenoate	0
	MOL011954	-8	Herbacetrin	5318021
	MOL011955	-8	kaempferol-3-diglucoside-7-glucoside	0
	MOL011991	-8	23-epi-26-deoxyactein_qt	0
	MOL012008	-8	25-o-acetylcimigenol-3-o-beta-d-galactoyranoside	0
	MOL012010	-8	25-o-acetylcimigenol-3-o-beta-d-glc(1-2)beta-d-xylopyranoside	0
	MOL012013	-8	25-o-anhydrocimigenol-3-beta-d-xylopyranoside	0
	MOL012032	-8	Heracleifolinoside C	0
	MOL012066	-8	cimilactone b_qt	0
	MOL012178	-8	6β-hydroxy-3-oxo-11α,12α-epoxyolean-28,13β-olide	0
	MOL012372	-8	(3R,4aR,6aS,6bS,8aS,11R,12aR,14bS)-4,4,6a,6b,8a,11,14b-heptamethyl-11-methylol-1,2,3,4a,7,8,9,10,12,12a,13,14-dodecahydropicen-3-ol	10003399
	MOL012472	-8	achybidensaponin,i_qt	0
	MOL012596	-8	kaempferol 3-O-α-L-(2〞,4〞-di-Z-p-coumaroyl)-rhamnoside	0
	MOL012701	-8	Kuwanon M	0
	MOL012717	-8	moracin M-6,3'-di-O-β-D-glucopyranoside	0
	MOL012721	-8	Morusin-4-glucoside	0
	MOL012736	-8	Multiflor-7-ene	0
	MOL012919	-8	Daurisoline	51106
	MOL012960	-8	jujuboside A	0
	MOL012972	-8	6'-O-p-Coumaroylgenipingentiobioside	6324973
	MOL013063	-8	Chrysin-7-O-β-D-glucuronide	0
	MOL013187	-8	Cubebin	117443
	MOL013206	-8	desmanthin-1	0
	MOL013321	-8	Abrusoside A_qt	0
	MOL013426	-8	terchebin	0
	MOL000007	-7.9	Cosmetin	5280704
	MOL000063	-7.9	ATRACTYLODES MACROCEPHALA	0
	MOL000355	-7.9	isorhamnetin-7-O-β-D-glucopyranoside	0
	MOL000356	-7.9	lupeol	259846
	MOL000367	-7.9	viscumneosideIII	0
	MOL000434	-7.9	acetylastragaloside I	0
	MOL000435	-7.9	acetylastragaloside I_qt	0
	MOL000527	-7.9	luteolin-4'-O-β-D-glucoside	67128659
	MOL000558	-7.9	quercetin-3-L-arabinon-7-D-glucoside	0
	MOL000567	-7.9	6-O-galloylhomoarbutin	0
	MOL000893	-7.9	difurocumenone	0
	MOL001244	-7.9	α-amyrenone	12306155
	MOL001327	-7.9	2,3-didehydro GA69	0
	MOL001338	-7.9	GA118	0
	MOL001343	-7.9	GA122	0
	MOL001357	-7.9	GA69	0
	MOL001362	-7.9	GA95	0
	MOL001411	-7.9	helichrysoside	0
	MOL001512	-7.9	amaranthin_qt	0
	MOL001513	-7.9	amaranthin	0
	MOL001655	-7.9	oleanolic acid-3-O-β-D-glucuronopyranoside_qt	25728252
	MOL001696	-7.9	Morusin	5281671
	MOL001712	-7.9	PGB	161177
	MOL001878	-7.9	4,5-Di-O-caffeoylquinic acid	6474309
	MOL001974	-7.9	[(2S,3R,4S,5S,6R)-3,4,5-trihydroxy-6-[[(2R,3R,4S,5S,6R)-3,4,5-trihydroxy-6-(hydroxymethyl)tetrahydropyran-2-yl]oxymethyl]tetrahydropyran-2-yl] (4aS,6aR,6aS,6bR,8aR,9R,10S,12aR,14bS)-10-[(2S,3R,4S,5S)-4,5-dihydroxy-3-[(2S,3R,4R,5R,6S)-3,4,5-trihydroxy-6-me	21627940
	MOL002238	-7.9	3-Hydroxy-25-norfriedel-3,1(10)-dien-2-one-30-oic acid	0
	MOL002342	-7.9	(+)-Limacine	0
	MOL002417	-7.9	fuzitine	0
	MOL002441	-7.9	Dioscin	0
	MOL002583	-7.9	3-O-Benzoyl-20-deoxyingenol	0
	MOL002626	-7.9	Adlantone	15558363
	MOL002673	-7.9	Hispidone	0
	MOL002763	-7.9	Kaempferol-3-O-rutinoside-7-O-galactoside	0
	MOL002766	-7.9	Quercetin-3,7-di-O-beta-d-glucoside	0
	MOL002969	-7.9	(3R,4R)-2',3',7-trihydroxy-4'-methoxy-4-[(3R)-2',7-dihydroxy-4'-methoxyisoflavan-5'-yl]-isoflavan	0
	MOL003062	-7.9	4,5'-Retro-.beta.,.beta.-Carotene-3,3'-dione, 4',5'-didehydro-	5380108
	MOL003232	-7.9	Triptofordin B1	0
	MOL003379	-7.9	Demissine	0
	MOL003441	-7.9	Chlorogenin	0
	MOL003653	-7.9	kaikasaponinIII	0
	MOL003956	-7.9	dihydrorutaecarpine	0
	MOL004015	-7.9	Rutaevin	0
	MOL004178	-7.9	orientin	5281675
	MOL004346	-7.9	16'-Decarbomethoxy-19,20-dihydroconoduramine	0
	MOL004374	-7.9	sagittatoside B	0
	MOL004405	-7.9	3-[(2S,3R,4R,5R,6S)-4,5-dihydroxy-6-methyl-3-[(2S,3R,4S,5S,6R)-3,4,5-trihydroxy-6-methyl-tetrahydropyran-2-yl]oxy-tetrahydropyran-2-yl]oxy-5-hydroxy-2-(4-methoxyphenyl)-8-(3-methylbut-2-enyl)-7-[(2S,3R,4S,5S,6R)-3,4,5-trihydroxy-6-methylol-tetrahydropyran	24721194
	MOL004409	-7.9	Epimedin C	5317090
	MOL004414	-7.9	epimedoside D	0
	MOL004448	-7.9	Solatubin	0
	MOL004487	-7.9	gitogenin	0
	MOL004515	-7.9	Timosaponin BII	0
	MOL004520	-7.9	neogitogenin	0
	MOL004639	-7.9	Saikosaponin V	0
	MOL004704	-7.9	saikosaponin e_qt	0
	MOL004910	-7.9	Glabranin	124049
	MOL004932	-7.9	glycyrrhizin	128229
	MOL004940	-7.9	neoliquiritin	51666249
	MOL005008	-7.9	Glycyrrhiza flavonol A	0
	MOL005017	-7.9	Phaseol	44257530
	MOL005052	-7.9	aloeresin C_qt	0
	MOL005309	-7.9	Araloside A	0
	MOL005323	-7.9	ginsenoside La	0
	MOL005328	-7.9	Ginsenoside-Ra1	0
	MOL005552	-7.9	gemin D	0
	MOL005564	-7.9	tellimagrandin I	0
	MOL005677	-7.9	periplocoside F_qt	0
	MOL005695	-7.9	Multiflorin	5319938
	MOL005710	-7.9	orientin-7-rhamnoside_qt	0
	MOL005777	-7.9	blestrianol A	0
	MOL005780	-7.9	blestrin B	14583572
	MOL005852	-7.9	1,2,6-tri-O-galloyl-β-D-glucopyranoside	0
	MOL005883	-7.9	gambiriin B-3	0
	MOL005925	-7.9	orobanchoside	0
	MOL005938	-7.9	kaikasaponinI_qt	0
	MOL005941	-7.9	azukisaponinI	0
	MOL006038	-7.9	Methy 2-O-methylPlatyconate A	0
	MOL006070	-7.9	robinin	0
	MOL006093	-7.9	δ-amyrin	12358447
	MOL006101	-7.9	(3S,4aR,6aR,6aS,6bR,8aR,12S,12aS,14aR,14bR)-4,4,6a,6b,8a,12,14b-heptamethyl-11-methylene-1,2,3,4a,5,6,6a,7,8,9,10,12,12a,13,14,14a-hexadecahydropicen-3-ol	24721046
	MOL006236	-7.9	Limonin diosphenol	0
	MOL006366	-7.9	2-(p-hydroxyphenyl)-ethanol-1-o-beta-d-apiofuranosyl,(1-6)-o-beta-d-glucopyranoside	0
	MOL006417	-7.9	(2R,3R,8R)-3,5-dihydroxy-2-(4-hydroxyphenyl)-8-isopropenyl-2,3,8,9-tetrahydrofuro[2,3-h]chromen-4-one	10937119
	MOL006429	-7.9	Hispidulin 7-glucoside	0
	MOL006431	-7.9	patuletin-3-o-[2-o-e-feruloyl-b-d-glucopyranosyl-(1-6)-b-d-glucopyranoside]	0
	MOL006506	-7.9	Ilekudinoside F	0
	MOL006538	-7.9	ilekudinoside E_qt	0
	MOL006544	-7.9	latifoloside C_qt	0
	MOL006690	-7.9	mimengoside,e	0
	MOL006802	-7.9	phyllaemblicin A	0
	MOL006815	-7.9	Punigluconin	0
	MOL006850	-7.9	C10822	0
	MOL006851	-7.9	solamargine	0
	MOL006892	-7.9	cynanoside,g_qt	0
	MOL006970	-7.9	homoaromoline	0
	MOL007081	-7.9	Danshenol B	3083515
	MOL007108	-7.9	isocryptotanshi-none	0
	MOL007241	-7.9	cornutaside a	0
	MOL007249	-7.9	3-Hydroxynorlupen-2-one	490365
	MOL007286	-7.9	(2R,3S,4R)-2-(3,4-dihydroxyphenyl)-4-[(2R,3R)-2-(3,4-dihydroxyphenyl)-3,5,7-trihydroxychroman-8-yl]-8-[(2R,3S,4S)-2-(3,4-dihydroxyphenyl)-3,5,7-trihydroxychroman-4-yl]chroman-3,5,7-triol	21676343
	MOL007309	-7.9	asiaticoside,c	0
	MOL007356	-7.9	solanocapsine	0
	MOL007457	-7.9	isosilychristin	0
	MOL007568	-7.9	heveaflavone	15559724
	MOL007634	-7.9	laxogenin	0
	MOL007806	-7.9	2-(3,4-dihydroxyphenyl)-5,6-dihydroxy-7-[(2S,3R,4S,5S,6R)-3,4,5-trihydroxy-6-(hydroxymethyl)oxan-2-yl]oxychromen-4-one	185766
	MOL007816	-7.9	plantasioside	44423103
	MOL007835	-7.9	orobanchoside_qt	0
	MOL007840	-7.9	azukisaponin_qt	0
	MOL008006	-7.9	paryriogenin A	0
	MOL008022	-7.9	Tetrapanoside A	0
	MOL008032	-7.9	(1S,2R,4aS,6aR,6aS,6bR,8aR,12aR,14bS)-1,2,6a,6b,9,9,12a-heptamethyl-10-oxo-1,2,3,4,5,6,6a,7,8,8a,11,12,13,14b-tetradecahydropicene-4a-carboxylic acid	9890209
	MOL008101	-7.9	yadanzioside N	0
	MOL008366	-7.9	protoerubosideB	0
	MOL008425	-7.9	berchemiasideB	0
	MOL008428	-7.9	3,4,8,10-tetrahydroxy-5H-chromeno[3,2-c]isochromen-7-one	11461162
	MOL008458	-7.9	Angustidine	0
	MOL008491	-7.9	ncariasideA	0
	MOL008512	-7.9	Vitisin C	16145527
	MOL008528	-7.9	Chikusetsu saponin Ib	0
	MOL008616	-7.9	(+)-2-N-Methylfangchinoline	0
	MOL008620	-7.9	Euscaphic acid 3,4-monoacetonide	0
	MOL008688	-7.9	capsicastrine_qt	0
	MOL008735	-7.9	solanine	0
	MOL008825	-7.9	N-demethylthalistyline	0
	MOL008840	-7.9	2-[(3alpha,12alpha-dihydroxy-24-oxo-5beta-cholan-24-yl)amino]ethanesulfonic acid	2733768
	MOL009093	-7.9	1,2,3,6-Tetragalloylglucose	73178
	MOL009102	-7.9	gemin D	0
	MOL009119	-7.9	platycaryanin A	0
	MOL009128	-7.9	2,3-HHDP-D-glucopyranose	0
	MOL009155	-7.9	14-Methyl-24-methylene-dihydromangiferodiol	0
	MOL009169	-7.9	Liensinine	160644
	MOL009171	-7.9	Neferin	159654
	MOL009223	-7.9	schisanlactone B	0
	MOL009269	-7.9	luteolin 7-O-glycoside	0
	MOL009322	-7.9	Sylvestroside III	0
	MOL009398	-7.9	lupan-3-one	11015452
	MOL009408	-7.9	oxotuberostemonine Ⅱ	0
	MOL009421	-7.9	sessilifoline A	0
	MOL009424	-7.9	sessilistemonamine B	0
	MOL009551	-7.9	isoprincepin	0
	MOL009557	-7.9	morinipticoside	0
	MOL009662	-7.9	Lantadene A	0
	MOL009834	-7.9	sesamolin	101746
	MOL009911	-7.9	Gypenoside LX	0
	MOL010134	-7.9	mogroside ⅡB	0
	MOL010175	-7.9	Tannin	0
	MOL010176	-7.9	cordiline	0
	MOL010367	-7.9	Yibeissine	0
	MOL010374	-7.9	yibeinoside A_qt	0
	MOL010377	-7.9	Yibeinoside C	0
	MOL010382	-7.9	Convallasaponin A	0
	MOL010388	-7.9	25(R)spirost-5-en-3beta-ol-3-o-beta-d-glucopyranosyl-(1-2)-[beta-d-xylylpyranylosyl-(1-3)]-beta-d-glucopyranosyl-(1-4)-beta-d-galactopyranose	0
	MOL010389	-7.9	25(R)spirost-5-en-3beta-ol-3-o-beta-d-glucopyranosyl-(1-2)-[beta-d-xylylpyranylosyl-(1-3)]-beta-d-glucopyranosyl-(1-4)-beta-d-galactopyranose_qt	0
	MOL010393	-7.9	25(R,S)spirost-5-ene-3beta,14alpha-diol-3-o-beta-d-glucopyranosyl-(1-2)-[beta-d-xylylpyranylosyl-(1-3)]-beta-d-glucopyranosyl-(1-4)-beta-d-galactopyranose	0
	MOL010406	-7.9	polygosides B_qt	0
	MOL010407	-7.9	polygosides E	0
	MOL010491	-7.9	procyanidin A1	0
	MOL010620	-7.9	Phlorofucofuroeckol A	130976
	MOL010994	-7.9	3beta-O-(alpha-L-rhamnopyranosyl-(1-2)-beta-D-glucopyranosyl-(1-4)-alpha-L-arabinopynanosyl)cyclamiretin A	0
	MOL011022	-7.9	ardisianoside C_qt	0
	MOL011034	-7.9	ardisianoside I	0
	MOL011259	-7.9	ganosporeric acid A	0
	MOL011329	-7.9	vittadinoside	0
	MOL011497	-7.9	(6R)-6-[(1R)-2-hydroxy-1-[(8S,9S,10R,13S,14S,17R)-1-keto-10,13-dimethyl-4,7,8,9,11,12,14,15,16,17-decahydrocyclopenta[a]phenanthren-17-yl]ethyl]-4-methyl-3-methylol-5,6-dihydropyran-2-one	14428178
	MOL011505	-7.9	Daturameteloside E	0
	MOL011507	-7.9	Daturameteloside F	0
	MOL011540	-7.9	withanolide D	0
	MOL011597	-7.9	Luteolin-4′-glucoside	26235513
	MOL011605	-7.9	syringetin-3-rutinoside	0
	MOL011680	-7.9	N-[(E)-2-[(2R,3S)-3-acetamido-2-(3,4-dihydroxyphenyl)-2,3-dihydro-1,4-benzodioxin-7-yl]vinyl]acetamide	16072146
	MOL011695	-7.9	11alpha-Methoxysaikosaponin f	0
	MOL011907	-7.9	(2S,4aS,10aR)-7-isopropyl-1,1,4a-trimethyl-2,3,4,9,10,10a-hexahydrophenanthren-2-ol	13996029
	MOL012272	-7.9	2,3-isopropylidene cyasterone	0
	MOL012280	-7.9	3-O-[α-L-rhamnopyranosyl-(1→3)β-D-glucopyranosiduronic acid] oleanolic acid	0
	MOL012297	-7.9	puerarin	5281807
	MOL012360	-7.9	3-Epiursolic Acid	0
	MOL012371	-7.9	7-Oxydihydrokarounidiol	122881
	MOL012430	-7.9	eriodictin	0
	MOL012471	-7.9	achybidensaponin,i	0
	MOL012502	-7.9	bidentatoside,i	0
	MOL012508	-7.9	chikusetsusaponin IVA butyl ester	44566502
	MOL012544	-7.9	(2R)-5,7-dihydroxy-2-(4-hydroxyphenyl)-8-[(2S,3R,4R,5S,6R)-3,4,5-trihydroxy-6-methylol-tetrahydropyran-2-yl]chroman-4-one	23514988
	MOL012570	-7.9	3α-trans-Feruloyloxy-2α-hydroxyurs-12-en-28-oic	0
	MOL012689	-7.9	cyclomulberrochromene	0
	MOL012708	-7.9	kuwanon V	45485203
	MOL012738	-7.9	oxyresveratrol-3'-O-β-D-glucopyranosyl-4-O-β-D-glucopyranosyl-(1→6)-O-β-D-glucopyranoside	0
	MOL012748	-7.9	76464-71-6	0
	MOL012761	-7.9	sanggenone N	0
	MOL012777	-7.9	kaempferol-3-O-α-L-rhamnoside	0
	MOL012845	-7.9	chikusetsusaponin Ⅳa_qt	0
	MOL012914	-7.9	dauricinoline	71463990
	MOL013213	-7.9	Isoeruboside_B	0
	MOL013214	-7.9	Isoeruboside_B_qt	0
	MOL013333	-7.9	Clerodendrin	5488004
	MOL000005	-7.8	(2R,3R,4R)-4-[(2R,3R)-2-(3,5-dihydroxy-4-methoxyphenyl)-3,5,7-trihydroxychroman-8-yl]-2-(4-hydroxyphenyl)chroman-3,5,7-triol	9808627
	MOL000014	-7.8	glucobrassicin	0
	MOL000155	-7.8	acteoside isomer	0
	MOL000349	-7.8	(2S)-5-hydroxy-2-(4-hydroxy-3-methoxyphenyl)-7-[(2S,3R,4S,5S,6R)-3,4,5-trihydroxy-6-(hydroxymethyl)oxan-2-yl]oxychroman-4-one	21629877
	MOL000370	-7.8	Homoeriodictyol-7-O-(6'-O-acetyl)glucopyranoside	3082946
	MOL000428	-7.8	asernestioside B_qt	0
	MOL000441	-7.8	LUPENONE	92158
	MOL000520	-7.8	alpha-amyrin	73170
	MOL000986	-7.8	1-Asarinine	101612
	MOL001023	-7.8	(8S,9S,10R,11R,13S,14S,17E)-17-ethylidene-11-hydroxy-10,13-dimethyl-1,2,6,7,8,9,11,12,14,15-decahydrocyclopenta[a]phenanthrene-3,16-dione	10568300
	MOL001093	-7.8	cabraleone	0
	MOL001094	-7.8	cabraleadiol	0
	MOL001124	-7.8	erlangerin A	0
	MOL001175	-7.8	Guggulsterone	6439929
	MOL001328	-7.8	2,3-didehydro GA70	0
	MOL001329	-7.8	2,3-didehydro GA77	0
	MOL001330	-7.8	2,3-didehydro GA9	0
	MOL001339	-7.8	GA119	0
	MOL001360	-7.8	GA77	0
	MOL001447	-7.8	oleanolic acid	14208454
	MOL001479	-7.8	chelidimerine	0
	MOL001508	-7.8	Isolactucerol	115250
	MOL001654	-7.8	Oleanolic acid-28-O-beta-D-glucopyranoside	0
	MOL001685	-7.8	orotinin	0
	MOL001721	-7.8	Isaindigodione	0
	MOL001911	-7.8	albiflorin R1	0
	MOL001946	-7.8	Ammijin	216283
	MOL001969	-7.8	Pulchinenoside A	0
	MOL001977	-7.8	cernuoside	0
	MOL002250	-7.8	[(2R,3R,4S,5R,6R)-3,5-dihydroxy-2-(3,4,5-trihydroxybenzoyl)oxy-6-[(3,4,5-trihydroxybenzoyl)oxymethyl]oxan-4-yl] 3,4,5-trihydroxybenzoate	11969003
	MOL002303	-7.8	palmidin A	0
	MOL002312	-7.8	[(3S,4R,5R)-5-[[(2R,3S,4S,5R,6S)-6-(2-acetyl-5-methoxyphenoxy)-3,4,5-trihydroxyoxan-2-yl]methoxy]-3,4-dihydroxyoxolan-3-yl]methyl 3,4,5-trihydroxybenzoate	9986231
	MOL002358	-7.8	Faradiol	0
	MOL002651	-7.8	Dehydrotanshinone II A	128994
	MOL002662	-7.8	rutaecarpine	0
	MOL002680	-7.8	Flavoxanthin	5281238
	MOL002715	-7.8	qt_carthamin-precursor	0
	MOL002762	-7.8	Kaempferol-3-O-beta-d-rutinoside	0
	MOL002776	-7.8	Baicalin	64982
	MOL002799	-7.8	verminoside	0
	MOL002967	-7.8	7-hydroxy-4'-methoxy-2',5'-dioxo-4-[(3R)-2',7-dihydroxy-4'-methoxyisoflavan-5'-yl]isoflavane	0
	MOL003159	-7.8	(5R,6S)-6-[[(2S,3R,4S,5S,6R)-3,4,5-trihydroxy-6-[[(2R,3R,4S,5S,6R)-3,4,5-trihydroxy-6-[[(2R,3R,4S,5S,6R)-3,4,5-trihydroxy-6-[[(2R,3R,4S,5S,6R)-3,4,5-trihydroxy-6-(hydroxymethyl)-2-tetrahydropyranyl]oxymethyl]-2-tetrahydropyranyl]oxymethyl]-2-tetrahydropyr	11216673
	MOL003162	-7.8	scabraside_qt	0
	MOL003181	-7.8	(2S,3R,4S,5S,6R)-2-[4-[(1S,3aR,4S,6aR)-4-[3-methoxy-4-[(2S,3R,4S,5S,6R)-3,4,5-trihydroxy-6-(hydroxymethyl)oxan-2-yl]oxyphenyl]-1,3,3a,4,6,6a-hexahydrofuro[4,3-c]furan-1-yl]-2,6-dimethoxyphenoxy]-6-(hydroxymethyl)oxane-3,4,5-triol	13991184
	MOL003199	-7.8	5,8-Dihydroxy-7-(4-hydroxy-5-methyl-coumarin-3)-coumarin	54714258
	MOL003620	-7.8	Karenin	6440661
	MOL003629	-7.8	Daidzein-4,7-diglucoside	171292
	MOL003636	-7.8	Sophoradochromene	5321394
	MOL003657	-7.8	Abrisapogenol D	0
	MOL003664	-7.8	Sophoranone	441767
	MOL003669	-7.8	subprogenin C	0
	MOL003810	-7.8	esculentoside C	0
	MOL003819	-7.8	esculentoside H	0
	MOL003886	-7.8	diosgenin glucoside	0
	MOL003890	-7.8	pseudoprotodioscin	0
	MOL003907	-7.8	erysimoside	12308885
	MOL003911	-7.8	evomonoside	0
	MOL003959	-7.8	limonin	0
	MOL003976	-7.8	12alpha-Hydroxyevodol	0
	MOL004099	-7.8	Luteolin 8-O-beta-D-galatoside	5319115
	MOL004152	-7.8	curculigosaponin H	0
	MOL004154	-7.8	Cynanuriculoside A_qt	0
	MOL004199	-7.8	Corynoloxine	0
	MOL004394	-7.8	Anhydroicaritin-3-O-alpha-L-rhamnoside	0
	MOL004421	-7.8	hexandraside D	0
	MOL004423	-7.8	hexandraside F	0
	MOL004450	-7.8	Chaksine	120699
	MOL004501	-7.8	Markogenin-3-O-beta-D-glucopyranosyl-(1-2)-beta-D-galactopyranoside_qt	0
	MOL004519	-7.8	markogenin	0
	MOL004523	-7.8	Anemarrhenasaponin-I	0
	MOL004596	-7.8	3',6'-O,O-diacetylsaikosaponin b2_qt	0
	MOL004674	-7.8	kaempferol-3,7-α-L-dirhamnoside	0
	MOL004676	-7.8	kaempferol-7-O-α-L-rhamnoside	0
	MOL004828	-7.8	Glepidotin A	5281619
	MOL004829	-7.8	Glepidotin B	442411
	MOL004887	-7.8	licorice-saponin C2_qt	0
	MOL004889	-7.8	licorice-saponin F3_qt	0
	MOL004906	-7.8	Hispaglabridin B	15228661
	MOL004925	-7.8	vitexin	5280441
	MOL005010	-7.8	Kanzonol E	15516846
	MOL005342	-7.8	Ginsenoside-Rg3	0
	MOL005417	-7.8	Lycoclavanol	0
	MOL005436	-7.8	24-Methylcholesta-5,7,22-trien-ebelta-ol	0
	MOL005461	-7.8	Doradexanthin	0
	MOL005462	-7.8	Methylcimicifugoside	0
	MOL005566	-7.8	urs-12-en-28-al	0
	MOL005572	-7.8	12-benzoyoxy daphnetoxin	0
	MOL005576	-7.8	5-hydroxy-2-(4-hydroxyphenyl)-7-[(2S,3R,4R,5R,6S)-3,4,5-trihydroxy-6-methyl-tetrahydropyran-2-yl]oxy-3-[(2S,3R,4S,5S,6R)-3,4,5-trihydroxy-6-[[(2S,3R,4R,5R,6S)-3,4,5-trihydroxy-6-methyl-tetrahydropyran-2-yl]oxymethyl]tetrahydropyran-2-yl]oxy-chromone	21676297
	MOL005619	-7.8	Tomentolide A	0
	MOL005746	-7.8	fernenone	0
	MOL005772	-7.8	bletlol C	0
	MOL005831	-7.8	Arborinol methy ether	0
	MOL005839	-7.8	procyanidin A1	0
	MOL005847	-7.8	clinopodiside A	0
	MOL005863	-7.8	methyl 6- O-digalloyl-β-glucopyranoside	0
	MOL005939	-7.8	soyasponinⅢ	0
	MOL006008	-7.8	3'-O-acetylPlatycodin D2	0
	MOL006050	-7.8	Platycodin D2	0
	MOL006058	-7.8	platycoside A	0
	MOL006059	-7.8	platycoside B	0
	MOL006092	-7.8	arnidiol	0
	MOL006176	-7.8	kaempferol-7-O-rhamnoside	0
	MOL006263	-7.8	22318-10-1	0
	MOL006277	-7.8	Shinjudilactone	0
	MOL006295	-7.8	ocotillol	12313665
	MOL006379	-7.8	Dihydrophelloside	0
	MOL006433	-7.8	patuletin-3-o-[b-d-glucopyranosyl-(1-3)-2-o-e-caffeoyl-b-d-glucopyranosyl-(1-6)-b-d-glucopyranoside_qt	0
	MOL006493	-7.8	torachrysone,8-o-beta-d-gentiobioside	0
	MOL006509	-7.8	Ilekudinoside H_qt	0
	MOL006541	-7.8	ilekudinoside J	0
	MOL006542	-7.8	(1R,2S,4aS,6aR,6aS,6bR,8aR,10S,12aR,14bS)-1,10-dihydroxy-1,2,6a,6b,9,9,12a-heptamethyl-2,3,4,5,6,6a,7,8,8a,10,11,12,13,14b-tetradecahydropicene-4a-carboxylic acid	21626432
	MOL006555	-7.8	ulmoidol	0
	MOL006559	-7.8	zigu一glucoside II	0
	MOL006626	-7.8	leachianone,g	0
	MOL006645	-7.8	sophoraflavoside IV_qt	0
	MOL006681	-7.8	echinacoside	0
	MOL006721	-7.8	celosin E	0
	MOL006768	-7.8	arjunglucoside I	0
	MOL006831	-7.8	terchebin	0
	MOL006836	-7.8	Flavocommelin	0
	MOL006852	-7.8	solamargine_qt	0
	MOL006853	-7.8	solasonine	0
	MOL006875	-7.8	atratoglaucoside,a_qt	0
	MOL007040	-7.8	1-ketoisocryptotanshinone	0
	MOL007093	-7.8	dan-shexinkum d	0
	MOL007120	-7.8	miltionone Ⅱ	5319836
	MOL007128	-7.8	paramiltioic acid	0
	MOL007154	-7.8	tanshinone iia	164676
	MOL007235	-7.8	physalin a	0
	MOL007236	-7.8	physalin d	0
	MOL007258	-7.8	ilexoside ii	0
	MOL007294	-7.8	procyanidin A2	0
	MOL007362	-7.8	Spirostan-3-ol, (3alpha,5alpha,25S)-	0
	MOL007439	-7.8	apigenin-6-c-rha-8-c-glu	0
	MOL007455	-7.8	silandrin	0
	MOL007566	-7.8	2,2',3,3'-tetrahydrorobustaflavone	25112482
	MOL007625	-7.8	desgalactotigonin7	0
	MOL007741	-7.8	epimedin c	0
	MOL007807	-7.8	Plantainoside C	6476335
	MOL007830	-7.8	crenatoside	0
	MOL007834	-7.8	orobanchoside	0
	MOL007849	-7.8	3-O-[β-D-glucopyranosyl(1→2)-β-D-glucuronopyranosyl]-azukisapogenol	0
	MOL007978	-7.8	quercitrin-2'-gallate	0
	MOL008016	-7.8	paryriogenin D	0
	MOL008083	-7.8	yadanzioside E	0
	MOL008115	-7.8	bruceine G	0
	MOL008217	-7.8	Paniculogenin	0
	MOL008318	-7.8	ardisiacrispin B	0
	MOL008492	-7.8	ncariasideA_qt	0
	MOL008519	-7.8	neotigogenin	0
	MOL008583	-7.8	beta-Sitosterol	0
	MOL008605	-7.8	hosenkosides D_qt	0
	MOL008610	-7.8	hosenkosides D	0
	MOL008638	-7.8	13-epicorynoline	0
	MOL008687	-7.8	capsicastrine	0
	MOL008814	-7.8	thalifaramine	10100789
	MOL008819	-7.8	thalifaronine	10055201
	MOL009027	-7.8	Cyclopamine	442972
	MOL009066	-7.8	Eriodictyol 7-glucuronide	124258
	MOL009067	-7.8	Isoglaucanone	0
	MOL009071	-7.8	Luteolin 7-glucoside-4'-neohesperidoside	0
	MOL009114	-7.8	1,2-di-O-galloyl-4,6-HHDP-bata-D-glucose	0
	MOL009176	-7.8	ephedrannin A	0
	MOL009181	-7.8	mahuannin E	0
	MOL009185	-7.8	mahuannin H	0
	MOL009187	-7.8	mahuannin J	0
	MOL009236	-7.8	angusifolin C	0
	MOL009370	-7.8	tuberostemonone	0
	MOL009455	-7.8	3-O-beta-D-Glucopyranosyl betulinic acid-28-O-beta-D-glucopyranosyl-(1-6)-beta-D-glucopyranoside_qt	0
	MOL009466	-7.8	27-O-(3-hydroxy-3-methylglutaroyl)-isonarthogenin-3-O-α-L-rhamnopyranosyl-(1→2)-O-[β-D-glucopyranosyl-(1→4)]-β-D-glucopyranosid	0
	MOL009584	-7.8	imperialine-3β-D-glucoside_qt	0
	MOL009762	-7.8	sibiricoside B_qt	0
	MOL009835	-7.8	Sesamolinol	443019
	MOL009887	-7.8	Gypenoside XXXVII	0
	MOL009917	-7.8	Gypenoside LXV	0
	MOL009926	-7.8	Gypenoside LXXIII	0
	MOL009960	-7.8	Gypenoside XXI	0
	MOL009968	-7.8	Gypenoside XXVI	0
	MOL010068	-7.8	(3S,8S,9R,10R,13R,14S,17R)-3-hydroxy-17-[(2R,5R)-6-hydroxy-6-methyl-5-[(2S,3R,4S,5S,6R)-3,4,5-trihydroxy-6-(hydroxymethyl)oxan-2-yl]oxyheptan-2-yl]-4,4,9,13,14-pentamethyl-1,2,3,7,8,10,12,15,16,17-decahydrocyclopenta[a]phenanthren-11-one	11093434
	MOL010075	-7.8	11-oxomogroside ⅣA	0
	MOL010076	-7.8	11-oxomogroside ⅣA_qt	0
	MOL010132	-7.8	mogroside ⅡA1	0
	MOL010145	-7.8	mogroside ⅣE	0
	MOL010212	-7.8	14-methyl-alpha-sitosterol	0
	MOL010360	-7.8	Sapindoside C	0
	MOL010362	-7.8	Sapindoside D	0
	MOL010384	-7.8	3-o-beta-d-glucopyranosyl-(1-2)-[beta-d-xylopyranosyl-(1-3)]-beta-d-glucopyranosyl-(1-4)-galactopyranosyl-25(S)-spirost-5(6)-en-3beta-ol	0
	MOL010386	-7.8	3-o-beta-d-glucopyranosyl-(1-2)-[beta-d-xylopyranosyl-(1-3)]-beta-d-glucopyranosyl-(1-4)-galactopyranosyl-25(S)-spirost-5(6)-en-3beta,14alpho-diol	0
	MOL010449	-7.8	asterbatanoside J	0
	MOL010451	-7.8	asterbatanoside K	0
	MOL010626	-7.8	89079-38-9	16132364
	MOL010648	-7.8	trichilinin D	0
	MOL010661	-7.8	melianone	0
	MOL010711	-7.8	rugosin E_qt	0
	MOL010866	-7.8	Arctignan E	0
	MOL010871	-7.8	isolappaol C	0
	MOL010949	-7.8	Cyclamin	0
	MOL010968	-7.8	primulanin	0
	MOL011029	-7.8	ardisianoside F	0
	MOL011177	-7.8	ganoderenic acid H	0
	MOL011323	-7.8	8-[5-(5,7-dihydroxy-4-keto-chromen-2-yl)-2-methoxy-phenyl]-5-hydroxy-7-methoxy-2-(4-methoxyphenyl)chromone	9894522
	MOL011477	-7.8	7-O-α-L-rhamnopyranosyl-Kaempferol	0
	MOL011488	-7.8	Datuarmeteloside C	0
	MOL011490	-7.8	Datumetelin	0
	MOL011495	-7.8	Daturametelin A_qt	0
	MOL011539	-7.8	Withametelin	0
	MOL011580	-7.8	5-hydroxy-2-(4-hydroxy-3-methoxyphenyl)-7-[(2S,3R,4S,5S,6R)-3,4,5-trihydroxy-6-(hydroxymethyl)oxan-2-yl]oxychromen-4-one	11294177
	MOL011675	-7.8	1,3,5-tri-o-caffeoylquinic acid	0
	MOL011681	-7.8	N-[(2S,3R)-7-(2-acetamidoethyl)-3-(3,4-dihydroxyphenyl)-2,3-dihydro-1,4-benzodioxin-2-yl]acetamide	10715163
	MOL011710	-7.8	3α,21α,22α,28-tetrahydroxyolean-12-ene-28-O-β-D-xylopyranoside_qt	0
	MOL011760	-7.8	epoxylutein	0
	MOL011812	-7.8	arnidiol	0
	MOL011887	-7.8	lysimachigenoside B	0
	MOL012030	-7.8	Heracleifolinoside B	0
	MOL012040	-7.8	Norkhelloside	0
	MOL012043	-7.8	actein	0
	MOL012046	-7.8	cimicifoetiside a_qt	0
	MOL012063	-7.8	cimilactone a	0
	MOL012080	-7.8	(20r,24r)-24,25-epoxy-3-beta-(beta-d-xylopyranosyloxy)-9,19-cyclolanost-7-ene-16,23-dione	0
	MOL012137	-7.8	magnolone	0
	MOL012143	-7.8	ACon1_002321	9960512
	MOL012370	-7.8	25-Nor-5(10)-dehydroisokarounidiol	489922
	MOL012435	-7.8	Gossypetin-3-beta-D-(2-O-beta-D-glucopyranosidoglucopyranoside)-8-beta-D-glucopyranoside	0
	MOL012468	-7.8	3-O-β-D-glucuronopyranoside-6-O-butyl ester	0
	MOL012526	-7.8	oleanolic acid 3-O-[β-D-glucuronopyranoside-6-O-butyl ester]-28-O-β-D-glucopyranoside	0
	MOL012530	-7.8	oleanolic acid-3-O-β-D-glucuronopyranoside	0
	MOL012556	-7.8	23-trans-p-coumaryhormentic acid	0
	MOL012603	-7.8	kaempherol-3-O-α-L-(2',4'-di-Z-p-coumaroyl)-rhamnoside	49822436
	MOL012616	-7.8	7-((6-Deoxy-alpha-L-mannopyranosyl)oxy)-2-(3,4-dihydroxyphenyl)-3,5-dihydroxy-4H-benzopyran-4-one	5748601
	MOL012620	-7.8	vomifoliol-9-o-β-D-apiofuranosyl(1→6)-β-D-glucopyranside	0
	MOL012632	-7.8	20-(R)-ginsenoside Rh2	0
	MOL012659	-7.8	ginsenoside Rh9_qt	0
	MOL012684	-7.8	6-hydroxycoumarin-6-O-α-rhamnopyranosyl-(1→6)-O-β-D-glucopyranoside	0
	MOL012705	-7.8	Kuwanon S	6450924
	MOL012712	-7.8	moracenin D	0
	MOL012715	-7.8	moracin M-3'-O-β-D-glucopyranoside	0
	MOL012750	-7.8	sanggenone C	0
	MOL012751	-7.8	sanggenone D	0
	MOL012759	-7.8	sanggenone L	0
	MOL012846	-7.8	Chikusetsusaponin Ia	0
	MOL012902	-7.8	6'-dauricinoline	0
	MOL012916	-7.8	dauricoline	0
	MOL012946	-7.8	zizyphus saponin I_qt	0
	MOL012947	-7.8	Zizyphus saponin II	0
	MOL012990	-7.8	Jujuboside C	0
	MOL013016	-7.8	Nepitrin	120742
	MOL013021	-7.8	Patulitrin	5320435
	MOL013155	-7.8	apigenin-6,8-di-c-β-D-glucopyranoside	0
	MOL013233	-7.8	EINECS 213-897-0	0
	MOL013348	-7.8	cryptoflavin	0
	MOL013349	-7.8	luteoxanthin	0
	MOL013350	-7.8	mutatoxanthin	0
	MOL013386	-7.8	carpinusin	0
	MOL013444	-7.8	naringenin-4'-glucoside-7-rutinoside	0
	MOL000286	-7.7	β-amyrin acetate	51398127
	MOL000309	-7.7	denudatin,a	13336517
	MOL000337	-7.7	3'-Methyl eriodictyol-7-O-beta-D-glucoside	0
	MOL000403	-7.7	astragalosideII	0
	MOL000433	-7.7	FA	6037
	MOL000638	-7.7	Macrophylloside A	0
	MOL000729	-7.7	Oxysanguinarine	0
	MOL000735	-7.7	cyclomulberrin	0
	MOL000768	-7.7	luteolin-7-O-α-L-rhamnopyranosyl(1→2)-β-D-glucopyranside	25203781
	MOL001058	-7.7	picropolygamain	0
	MOL001092	-7.7	[(3R,5R,8R,9R,10R,13R,14R,17S)-17-[(2S,5S)-5-(2-hydroxypropan-2-yl)-2-methyloxolan-2-yl]-4,4,8,10,14-pentamethyl-2,3,5,6,7,9,11,12,13,15,16,17-dodecahydro-1H-cyclopenta[a]phenanthren-3-yl] acetate	12019028
	MOL001096	-7.7	α-amirone	0
	MOL001238	-7.7	3-Epilupeol	5270628
	MOL001340	-7.7	GA120	0
	MOL001341	-7.7	GA121	0
	MOL001346	-7.7	GA126	0
	MOL001369	-7.7	Grandidentatin	52041673
	MOL001413	-7.7	carthamin	0
	MOL001448	-7.7	arjunetin	0
	MOL001459	-7.7	corysamine	0
	MOL001505	-7.7	Pyracrenic acid	6439576
	MOL001695	-7.7	Quercimeritrin (6CI,7CI,8CI)	5282160
	MOL001770	-7.7	beta-Sitosterol-alpha-glucoside	12309077
	MOL001799	-7.7	Pyropheophorbide α Methyl Ester	0
	MOL001902	-7.7	3β,23-dihydroxy-oleana-11,13(18)-dien-28-oic acid	0
	MOL001929	-7.7	alexandrin	0
	MOL001932	-7.7	galloylpaeoniflorin	0
	MOL002039	-7.7	Isopimaric acid	442048
	MOL002060	-7.7	delta-amyrone	14079468
	MOL002355	-7.7	Cycleaneonine	0
	MOL002439	-7.7	Elatine	0
	MOL002617	-7.7	Diplopterol	164874
	MOL002668	-7.7	Worenine	0
	MOL002708	-7.7	precarthamin	0
	MOL002976	-7.7	(3R,4R)-2',7-dihydroxy-4',5'-dimethoxy-4-[(3R)-2',7-dihydroxy-4'-methoxyisoflavan-5'-yl]isoflavan	0
	MOL003049	-7.7	Olean-12-en-28-oic acid, 23-hydroxy-3-((O-beta-D-xylopyranosyl-(1-3)-O-6-deoxy-alpha-L-mannopyranosyl-(1-2)-alpha-L-arabinopyranosyl)oxy)-, (3beta,4alpha)-	161686
	MOL003054	-7.7	eriodictyol-7-o-glucoside	0
	MOL003059	-7.7	kryptoxanthin	0
	MOL003079	-7.7	(1alpha,3R,4alpha,5R)-3,4,5-Tris[[(2E)-3-(3,4-dihydroxyphenyl)-1-oxo-2-propen-1-yl]oxy]-1-hydroxycyclohexanecarboxylic acid	0
	MOL003156	-7.7	pseudotaraxasterol	0
	MOL003250	-7.7	Triptotin	0
	MOL003251	-7.7	Triptotriterpenic acid A	0
	MOL003352	-7.7	Procyanidin	0
	MOL003365	-7.7	Lactucasterol	0
	MOL003373	-7.7	Sutchuenensine IV	0
	MOL003425	-7.7	Pseudostrychnine	0
	MOL003569	-7.7	3,5,8-trihydroxy-2-(4-hydroxyphenyl)-7-[(2S,3R,4R,5R,6S)-3,4,5-trihydroxy-6-methyl-tetrahydropyran-2-yl]oxy-chromone	21626477
	MOL003598	-7.7	9-hydroxy-4-[(7-methoxy-2-oxochromen-8-yl)methyl]furo[3,2-g]chromen-7-one	10715412
	MOL003643	-7.7	(2S,3S,4S,5R,6R)-6-[[(3S,4S,4aR,6aR,6bS,8aR,9R,12aS,14aR,14bR)-9-hydroxy-4-(hydroxymethyl)-4,6a,6b,8a,11,11,14b-heptamethyl-1,2,3,4a,5,6,7,8,9,10,12,12a,14,14a-tetradecahydropicen-3-yl]oxy]-3,4-dihydroxy-5-[[(2S,3R,4S,5R,6R)-3,4,5-trihydroxy-6-(hydroxymet	21607811
	MOL003644	-7.7	Withaferine	0
	MOL003647	-7.7	Sophojaponicin	0
	MOL003651	-7.7	(4aR,6aR,6aS,6bR,8aR,9S,10S,12aR,14bS)-10-hydroxy-2,2,4a,6a,6b,9,12a-heptamethyl-9-methylol-3,5,6,6a,7,8,8a,10,11,12,13,14b-dodecahydro-1H-picen-4-one	13632872
	MOL003661	-7.7	7-hydroxy-2-[4-[(2S,3R,4S,5S,6R)-3,4,5-trihydroxy-6-methylol-tetrahydropyran-2-yl]oxyphenyl]chromone	5491513
	MOL003670	-7.7	subprogenin D	0
	MOL003714	-7.7	Jionoside A	0
	MOL003720	-7.7	Purpureaside C	0
	MOL003820	-7.7	esculentoside I	0
	MOL003963	-7.7	hydroxyevodiamine	0
	MOL004028	-7.7	3-O-(2-rhamnosylglucosyl) oleanolic acid	0
	MOL004085	-7.7	taraxasterol	0
	MOL004105	-7.7	Quercetin-3-L-arabinon-7-D-glucoside	0
	MOL004111	-7.7	ZINC04027388	7077273
	MOL004349	-7.7	Ruvoside	0
	MOL004354	-7.7	2-(3,4-dihydroxyphenyl)-5,7-dihydroxy-3-[(2R,3R,4S,5R)-3,4,5-trihydroxytetrahydropyran-2-yl]oxy-chromone	10274530
	MOL004382	-7.7	Yinyanghuo A	0
	MOL004384	-7.7	Yinyanghuo C	5315395
	MOL004386	-7.7	Yinyanghuo E	5315397
	MOL004392	-7.7	acuminatoside	0
	MOL004411	-7.7	(2S,3S)-3,5-dihydroxy-2-(4-hydroxyphenyl)-8-(3-methylbut-2-enyl)-7-[(2S,3R,4S,5S,6R)-3,4,5-trihydroxy-6-methylol-tetrahydropyran-2-yl]oxy-chroman-4-one	7163182
	MOL004425	-7.7	Icariin	5318997
	MOL004435	-7.7	Ikarisoside F	5318413
	MOL004451	-7.7	Peiminine	0
	MOL004492	-7.7	Chrysanthemaxanthin	0
	MOL004507	-7.7	Smilagenone	0
	MOL004524	-7.7	Anemarrhenasaponin-I_qt	0
	MOL004528	-7.7	Icariin I	0
	MOL004530	-7.7	Timosaponin A-III_qt	0
	MOL004534	-7.7	Anemarrhenasaponin-Ia	0
	MOL004840	-7.7	Liconeolignan	133867
	MOL004846	-7.7	apioglycyrrhizin_qt	0
	MOL004866	-7.7	2-(3,4-dihydroxyphenyl)-5,7-dihydroxy-6-(3-methylbut-2-enyl)chromone	14604081
	MOL004891	-7.7	shinpterocarpin	0
	MOL004894	-7.7	licorice-saponin H2	0
	MOL004911	-7.7	Glabrene	480774
	MOL004986	-7.7	6″-O-acetylliquiritin	0
	MOL004993	-7.7	8-prenylated eriodictyol	0
	MOL004995	-7.7	Kanzonol H	480863
	MOL004997	-7.7	Araboglycyrrhizin	0
	MOL004998	-7.7	Araboglycyrrhizin_qt	0
	MOL005039	-7.7	aloveroside	0
	MOL005241	-7.7	Pennogenin	0
	MOL005584	-7.7	yuanhuacin	0
	MOL005655	-7.7	Glycoside K	0
	MOL005753	-7.7	1,6-bis(p-hydroxybenzyl)-4-methoxy-9,10-dihydrophenanthrene	0
	MOL005848	-7.7	NSC 258312	99651
	MOL005873	-7.7	sanguisorbin B	0
	MOL005876	-7.7	sanguisorbin E_qt	0
	MOL006043	-7.7	methyl platyconate- A	0
	MOL006080	-7.7	amaranthin	0
	MOL006120	-7.7	8-Gingerol	0
	MOL006359	-7.7	22-hydroxyhopan-3-one	21582894
	MOL006515	-7.7	Kudinoside C	0
	MOL006516	-7.7	Kudinoside D	0
	MOL006523	-7.7	Kudinoside J	0
	MOL006537	-7.7	[(2S,3R,4S,5S,6R)-3,4,5-trihydroxy-6-(hydroxymethyl)tetrahydropyran-2-yl] (1R,2R,4aS,6aR,6aS,6bR,8aR,10S,12aR,14bS)-10-[(2S,3R,4S,5S)-3,5-dihydroxy-4-[(2S,3R,4S,5S,6R)-3,4,5-trihydroxy-6-(hydroxymethyl)tetrahydropyran-2-yl]oxy-tetrahydropyran-2-yl]oxy-1-h	21635825
	MOL006543	-7.7	latifoloside B	0
	MOL006552	-7.7	osmanthuside B6	0
	MOL006557	-7.7	Ziyuglycoside I	0
	MOL006678	-7.7	celogenamide,a	0
	MOL006683	-7.7	forsythoside,b	0
	MOL006843	-7.7	malonylawobanin	0
	MOL006847	-7.7	2,3,4,6-tetra-o-galloyl-d-glucopyranoside	0
	MOL006917	-7.7	cynatratoside,f	0
	MOL006984	-7.7	stesakine	0
	MOL007009	-7.7	4-o-galloylalbiflorin	0
	MOL007023	-7.7	galloylpaeoniflorine	0
	MOL007045	-7.7	3α-hydroxytanshinoneⅡa	14626764
	MOL007080	-7.7	Tanshinol A	5321622
	MOL007095	-7.7	danshenspiroketallactoneii	0
	MOL007239	-7.7	cornutaside c	0
	MOL007250	-7.7	3-beta-hydroxylup-20(29)-en-30-al	10071968
	MOL007316	-7.7	3,5-di-o-caffeoylquinic acid	0
	MOL007381	-7.7	mudanpioside-h	0
	MOL007413	-7.7	schaftoside	0
	MOL007414	-7.7	isoschaftoside	0
	MOL007456	-7.7	Isosilybin	0
	MOL007612	-7.7	3',5-dihydroxy-4'-methoxyflavone 7-o-β-glucosyl (1.2)-α-d- rhamnoseside	0
	MOL007636	-7.7	macrostemonoside a	0
	MOL007694	-7.7	dichotomin,h	0
	MOL007824	-7.7	3,4-Dihydroxy-beta-phenethyl-O-beta-D-glucopyranosyl-(1-3)-O-alpha-L-rhmnopyranosyl-(1-6)-4-O-caffeoyl-beta-D-glucopyranoside	0
	MOL007893	-7.7	glut-5-en-3β,28-diol	0
	MOL007930	-7.7	hesperidin	10621
	MOL008004	-7.7	papyrioside L- IIa	0
	MOL008089	-7.7	yadanzioside H	0
	MOL008091	-7.7	yadanzioside I	0
	MOL008390	-7.7	5-Mpe-bis(hobz)phenol	5319481
	MOL008438	-7.7	[(2S,3R,4S,5S,6R)-3,4,5-trihydroxy-6-(hydroxymethyl)oxan-2-yl] (1R,2R,4aS,6aR,6aS,6bR,8aR,9R,10R,11R,12aR,14bS)-1,10,11-trihydroxy-9-(hydroxymethyl)-1,2,6a,6b,9,12a-hexamethyl-2,3,4,5,6,6a,7,8,8a,10,11,12,13,14b-tetradecahydropicene-4a-carboxylate	16118969
	MOL008511	-7.7	Vitexin-7-glucoside_qt	0
	MOL008537	-7.7	Lactucopicrin	0
	MOL008576	-7.7	Gitogenin	0
	MOL008631	-7.7	12-hydroxycorynoline	0
	MOL008643	-7.7	spallidamine	0
	MOL008738	-7.7	solasonine_qt	0
	MOL008806	-7.7	TBL	21470
	MOL008836	-7.7	N-(3alpha,12alpha-dihydroxy-5beta-cholan-24-oyl)glycine	3035026
	MOL008928	-7.7	handelin chrysanthelide	0
	MOL009010	-7.7	(+)-Pinoresinol-di-O-β-D-glucoside	0
	MOL009072	-7.7	Prunin	92794
	MOL009088	-7.7	Neoeriocitrin	114627
	MOL009099	-7.7	casuarinin	0
	MOL009121	-7.7	rugosin C	0
	MOL009178	-7.7	mahuannin A	0
	MOL009219	-7.7	neokadsuranic acid C	0
	MOL009254	-7.7	galbacin	11175182
	MOL009312	-7.7	(E,E)-3,5-Di-O-caffeoylquinic acid	0
	MOL009384	-7.7	bisdehydrotuberostemonine C	0
	MOL009390	-7.7	isobisdehydrostemoninine	0
	MOL009407	-7.7	oxotuberostemonine	0
	MOL009545	-7.7	citrifolinin A-1	0
	MOL009593	-7.7	verticinone	0
	MOL009596	-7.7	sinpemine A	0
	MOL009599	-7.7	songbeinone	0
	MOL009600	-7.7	songbeisine	0
	MOL009616	-7.7	24-Methylenecycloartanol ferulate	0
	MOL009744	-7.7	Soyasaponin A2	0
	MOL009761	-7.7	sibiricoside B	0
	MOL009830	-7.7	EHD	0
	MOL009889	-7.7	Gypenoside I	0
	MOL009891	-7.7	Gypenoside IV	0
	MOL009897	-7.7	Gypenoside III	0
	MOL009899	-7.7	Gypenoside LIII	0
	MOL009901	-7.7	Gypenoside LIV	0
	MOL009914	-7.7	Gypenoside LXII	0
	MOL009930	-7.7	Gypenoside LXXV	0
	MOL009941	-7.7	Gypenoside XIX	0
	MOL009965	-7.7	Gypenoside XXIX	0
	MOL009976	-7.7	Gypenoside XXXII	0
	MOL009987	-7.7	Gypinoside III	0
	MOL010062	-7.7	11-dehydroxymogroside Ⅲ	17752184
	MOL010064	-7.7	11-deoxymogroside Ⅲ	0
	MOL010070	-7.7	11-oxomogroside ⅡA1	0
	MOL010182	-7.7	pingbeininoside	0
	MOL010183	-7.7	pingbeininoside_qt	0
	MOL010261	-7.7	isorhamnetin-3-O-β-rutinoside	0
	MOL010383	-7.7	Convallasaponin A_qt	0
	MOL010394	-7.7	STOCK1N-66370	0
	MOL010398	-7.7	polygosides A_qt	0
	MOL010473	-7.7	shionone	12315507
	MOL010718	-7.7	1,2,6-tri-O-galloyl-β-D-glucose	0
	MOL010877	-7.7	lappaol F	0
	MOL010933	-7.7	ardisianoside K	0
	MOL010934	-7.7	ardisianoside K_qt	0
	MOL010935	-7.7	ardisicrenoside A	0
	MOL010976	-7.7	triterpene glycoside 4_qt	0
	MOL010978	-7.7	triterpenoid glycoside 2_qt	0
	MOL010981	-7.7	triterpenoid glycoside 3_qt	0
	MOL011018	-7.7	ardisiamamilloside H_qt	0
	MOL011031	-7.7	ardisianoside G_qt	0
	MOL011037	-7.7	ardisianoside J_qt	0
	MOL011178	-7.7	ganoderenic acid I	0
	MOL011468	-7.7	Pinoresinol diglucoside	174003
	MOL011472	-7.7	7-O-β-D-glucopyranosyl-KaemPferol	0
	MOL011474	-7.7	3-O-β-D-glueopyranosyl-(1→2)glueoPyranosyl-Kaempferol	0
	MOL011475	-7.7	7-O-β-D-glueopyranosyl-Kaempferol	0
	MOL011481	-7.7	Datuarmeteline E	0
	MOL011512	-7.7	Daturameteloside H_qt	0
	MOL011530	-7.7	Quercetin-3	0
	MOL011542	-7.7	withanoside Ⅲ_qt	0
	MOL011809	-7.7	(3S,5R,8R,9R,10R,13R,14R,17S)-17-[(2S,5S)-5-(2-hydroxypropan-2-yl)-2-methyloxolan-2-yl]-4,4,8,10,14-pentamethyl-2,3,5,6,7,9,11,12,13,15,16,17-dodecahydro-1H-cyclopenta[a]phenanthren-3-ol	21575463
	MOL011811	-7.7	Tilianine	5321954
	MOL011814	-7.7	Calenduladiol	461835
	MOL011818	-7.7	Coflodiol	5273648
	MOL011845	-7.7	Hesperetin-5-glucoside	0
	MOL011950	-7.7	Gossypitrin	0
	MOL012015	-7.7	26-deoxyactein	0
	MOL012023	-7.7	7,8-didehydrocimigenol	0
	MOL012025	-7.7	Cimiside D_qt	0
	MOL012067	-7.7	cimiside e	0
	MOL012172	-7.7	leiocarposide	0
	MOL012237	-7.7	daucosterol	0
	MOL012362	-7.7	Capsanthin	5281228
	MOL012459	-7.7	28-deglucosyl-chikusetsusaponin,iva	0
	MOL012480	-7.7	achyranthoside A	0
	MOL012482	-7.7	achyranthoside A trimethyl ester	0
	MOL012499	-7.7	achyranthoside E trimethyl ester	0
	MOL012503	-7.7	bidentatoside,i_qt	0
	MOL012511	-7.7	Chikusetsusaponin V methyl ester	0
	MOL012519	-7.7	Monoglucuronide F	176079
	MOL012533	-7.7	quercetin-3-O-rutinoside	0
	MOL012540	-7.7	zingibroside r1	0
	MOL012543	-7.7	(2R)-8-[(2S,3R,4S,5S,6R)-4,5-dihydroxy-6-methylol-3-[(2S,3R,4R,5R,6S)-3,4,5-trihydroxy-6-methyl-tetrahydropyran-2-yl]oxy-tetrahydropyran-2-yl]-5,7-dihydroxy-2-(4-hydroxyphenyl)chroman-4-one	10507459
	MOL012545	-7.7	(2S)-8-[(2S,3R,4S,5S,6R)-4,5-dihydroxy-6-methylol-3-[(2S,3R,4R,5R,6S)-3,4,5-trihydroxy-6-methyl-tetrahydropyran-2-yl]oxy-tetrahydropyran-2-yl]-5,7-dihydroxy-2-(4-hydroxyphenyl)chroman-4-one	10603320
	MOL012601	-7.7	kaempherol-3-O-α-L-(2',4'-di-E-feruloyl)-rhamnoside	0
	MOL012615	-7.7	quercetin-4'-O-β-D-galactoside	0
	MOL012647	-7.7	Ginsenoside Rd2	0
	MOL012670	-7.7	majoroside F4	0
	MOL012710	-7.7	limonianin	14162621
	MOL012722	-7.7	Oxydihydromorusin	5481968
	MOL012725	-7.7	Mulberrofuran C	157143
	MOL012729	-7.7	Mulberrofuran N	5319929
	MOL012741	-7.7	oxyresveratrol-4-O-β-D-glucopyranosyl-3'-O-β-D-apiofuranosyl-(1→6)-O-β-D-glucopyranoside	0
	MOL012747	-7.7	sanggenol N	42608051
	MOL012752	-7.7	sanggenone E	0
	MOL012762	-7.7	sanggenone O	15479637
	MOL012786	-7.7	quercetin-3-O-α-L-galactoside	25079947
	MOL012859	-7.7	Vina-ginsenoside R1_qt	0
	MOL012945	-7.7	Zizyphus saponin III	0
	MOL012959	-7.7	jujubasaponin IV_qt	0
	MOL013015	-7.7	Quercetagitrin	5320826
	MOL013065	-7.7	Teucvin	0
	MOL013071	-7.7	Scutellarein-7-rutinoside	5321203
	MOL013327	-7.7	(2S,3S,4S,5R,6R)-6-[[(3S,4S,4aR,6aR,6bS,8aR,9R,12aS,14aR,14bR)-9-hydroxy-4-(hydroxymethyl)-4,6a,6b,8a,11,11,14b-heptamethyl-1,2,3,4a,5,6,7,8,9,10,12,12a,14,14a-tetradecahydropicen-3-yl]oxy]-3,4,5-trihydroxyoxane-2-carboxylic acid	13632905
	MOL013329	-7.7	Soyasaponin V_qt	0
	MOL013341	-7.7	3'-Methoxypuerarin	5319485
	MOL013366	-7.7	Apimaysin	0
	MOL013370	-7.7	Maysin_qt	0
	MOL000111	-7.6	quercetin,3-o-rutinoside	0
	MOL000263	-7.6	oleanolic acid	10494
	MOL000344	-7.6	Viscumneoside VI	0
	MOL000361	-7.6	Amyrin	73145
	MOL000393	-7.6	Soyasaponin I	122097
	MOL000415	-7.6	rutin	5280805
	MOL000439	-7.6	isomucronulatol-7,2'-di-O-glucosiole	15689653
	MOL000462	-7.6	3-O-(6-O-methyl-β-D-glucuronopyranosyl)methyl asiatate	0
	MOL000543	-7.6	raddeanin A	0
	MOL000544	-7.6	(4aS,6aR,6aS,6bR,8aR,10S,12aR,14bS)-2,2,6a,6b,9,9,12a-heptamethyl-10-[(2S,3R,4S,5S)-3,4,5-trihydroxyoxan-2-yl]oxy-1,3,4,5,6,6a,7,8,8a,10,11,12,13,14b-tetradecahydropicene-4a-carboxylic acid	13878127
	MOL000760	-7.6	hederasaponin B	0
	MOL000780	-7.6	Adlumidine	120734
	MOL000856	-7.6	alisol C monoacetate	0
	MOL001019	-7.6	(7S,8R,9S,10R,13S,14S,17Z)-17-ethylidene-7-hydroxy-10,13-dimethyl-1,2,6,7,8,9,11,12,14,15-decahydrocyclopenta[a]phenanthrene-3,16-dione	10496532
	MOL001024	-7.6	(8R,9S,10R,11R,13S,14S,15S,17E)-17-ethylidene-11,15-dihydroxy-10,13-dimethyl-1,2,6,7,8,9,11,12,14,15-decahydrocyclopenta[a]phenanthrene-3,16-dione	10831307
	MOL001131	-7.6	phellamurin_qt	0
	MOL001222	-7.6	Estan	6010
	MOL001232	-7.6	TES	6013
	MOL001241	-7.6	O-acetyl-α-boswellic acid	0
	MOL001344	-7.6	GA122-isolactone	0
	MOL001412	-7.6	crosatoside A	0
	MOL001469	-7.6	methoxychelidonine	0
	MOL001520	-7.6	isogomphreninIII	0
	MOL001529	-7.6	jujuboside B_qt	0
	MOL001638	-7.6	Phorbol	0
	MOL001726	-7.6	pinoresinol-4-O-beta-D-apiosyl-beta-D-glucopyranoside	0
	MOL001930	-7.6	benzoyl paeoniflorin	0
	MOL001981	-7.6	pulsatilla saponin D	0
	MOL002009	-7.6	Quercitrin-2'-gallate	0
	MOL002035	-7.6	3,5-dihydroxy-2-(4-hydroxyphenyl)-7-[(2S,3R,4S,5S,6R)-3,4,5-trihydroxy-6-(hydroxymethyl)oxan-2-yl]oxychromen-4-one	10095180
	MOL002269	-7.6	Rheinoside A	13888124
	MOL002354	-7.6	Cissampareine	0
	MOL002381	-7.6	Tinnevellin glucoside	5318296
	MOL002392	-7.6	Deltoin	0
	MOL002410	-7.6	benzoylnapelline	0
	MOL002442	-7.6	Cholesteryl ferulate	0
	MOL002597	-7.6	Euphol	441678
	MOL002660	-7.6	niloticin	44559946
	MOL002700	-7.6	luteolin-7-0-B-D-glucoside	0
	MOL002728	-7.6	sesquiterpene	13345443
	MOL002755	-7.6	6-hydroxykaempferol-6,7-di-O-beta-D-glucoside	0
	MOL002779	-7.6	carthamin-precursor	0
	MOL002846	-7.6	Piperitylhonokiol	13337242
	MOL002906	-7.6	Corchoroside A	0
	MOL002916	-7.6	2-(2,6-dihydroxyphenyl)-3,5,7-trihydroxy-chromone	5320471
	MOL002931	-7.6	scutellarin	185617
	MOL003034	-7.6	disacoside B	0
	MOL003038	-7.6	fulvotomentoside A	0
	MOL003067	-7.6	3,4-Dicaffeoylquinic acid	0
	MOL003140	-7.6	Amarogentin	0
	MOL003161	-7.6	scabraside	0
	MOL003314	-7.6	suspensaside B	0
	MOL003332	-7.6	Forsythoside C	0
	MOL003334	-7.6	Forsythoside D	0
	MOL003405	-7.6	Chloromaloside	0
	MOL003421	-7.6	Normenisarine	0
	MOL003422	-7.6	Novobiocin	54675769
	MOL003439	-7.6	7alpha-Hydroxyconessine	0
	MOL003515	-7.6	(3S,4S,4aR,6aR,6bS,8aS,12aS,14aR,14bR)-3-hydroxy-4,6a,6b,11,11,14b-hexamethyl-1,2,3,4a,5,6,7,8,9,10,12,12a,14,14a-tetradecahydropicene-4,8a-dicarboxylic acid	15560324
	MOL003542	-7.6	8-Isopentenyl-kaempferol	5318624
	MOL003646	-7.6	Abrisapogenol C	0
	MOL003734	-7.6	echinacoside	0
	MOL003779	-7.6	3-Epi-oleanolic acid-28-O-alpha-L-rhamno-pyranosyl-(1-B58666)-beta-D-glucopyranoside_qt	0
	MOL003818	-7.6	esculentoside G	0
	MOL003858	-7.6	Moracin D	641378
	MOL003894	-7.6	Smilagenin	0
	MOL004096	-7.6	epifriedelanol acetate	13688752
	MOL004151	-7.6	curculigosaponin G	0
	MOL004231	-7.6	Tetrahydrocorysamine	0
	MOL004376	-7.6	wanepimedoside A	0
	MOL004390	-7.6	5,7,4'-trihydroxy8,3'-diprenylflavone	0
	MOL004432	-7.6	4H-1-Benzopyran-4-one, 3-((6-deoxy-alpha-L-mennopyranosyl)oxy)-5,7-dihydroxy-2-(4-hydroxyphenyl)-8-(3-methyl-2-butenyl)-	5481982
	MOL004453	-7.6	Peiminoside_qt	0
	MOL004490	-7.6	Anemarsaponin G	0
	MOL004491	-7.6	Anemarsaponin G_qt	0
	MOL004505	-7.6	Smilagenin-3-O[beta-D-glucopyranosyl-(1-2)]-beta-D-mannopyranoside	0
	MOL004512	-7.6	Timosaponin A-1_qt	0
	MOL004526	-7.6	Neomangiferin	0
	MOL004867	-7.6	Gancaonin P	5481966
	MOL004884	-7.6	Licoisoflavone B	5481234
	MOL004927	-7.6	Hispaglabridin A	442774
	MOL004935	-7.6	Sigmoidin-B	73205
	MOL004936	-7.6	Uralene	192490
	MOL004952	-7.6	licuraside	14282455
	MOL005058	-7.6	Isoeleutherol glucoside	0
	MOL005148	-7.6	mauritianin	0
	MOL005196	-7.6	Ursolic acid deriv.	6475119
	MOL005273	-7.6	16-Oxoseratenediol	0
	MOL005291	-7.6	3-O-beta-D-Glucuronopyranosyl gypsogenin	0
	MOL005326	-7.6	Ginsenoside-Ra0	0
	MOL005333	-7.6	ginsenoside-Rb2	0
	MOL005345	-7.6	(2R,3S,4S,5R,6R)-2-(hydroxymethyl)-6-[[(3S,5R,8R,9R,10R,12R,13R,14R,17S)-12-hydroxy-4,4,8,10,14-pentamethyl-17-[(2Z)-6-methylhepta-2,5-dien-2-yl]-2,3,5,6,7,9,11,12,13,15,16,17-dodecahydro-1H-cyclopenta[a]phenanthren-3-yl]oxy]oxane-3,4,5-triol	20839223
	MOL005471	-7.6	[(2R,3R,4S,5S,6R)-4,5-dihydroxy-2-(3,4,5-trihydroxybenzoyl)oxy-6-[(3,4,5-trihydroxybenzoyl)oxymethyl]oxan-3-yl] 3,4,5-trihydroxybenzoate	11969002
	MOL005489	-7.6	3,6-Digalloylglucose	0
	MOL005651	-7.6	Glycoside H1	0
	MOL005662	-7.6	alpha-Amyrin acetate	0
	MOL005663	-7.6	glycoside E	0
	MOL005684	-7.6	(2R,3S,4R,6S)-6-[(1S)-1-[(3S,8R,9S,10R,13S,14S,17R)-3,17-dihydroxy-10,13-dimethyl-1,2,3,4,7,8,9,11,12,14,15,16-dodecahydrocyclopenta[a]phenanthren-17-yl]ethoxy]-2-methyloxane-3,4-diol	15608626
	MOL005686	-7.6	periplocoside O_qt	0
	MOL005696	-7.6	Multinoside A	5319943
	MOL005701	-7.6	Linarin isovalerate	5319030
	MOL005775	-7.6	Blestriarene B	442695
	MOL005846	-7.6	pectolinarin	0
	MOL005871	-7.6	sanguiin H-6	0
	MOL005946	-7.6	sophorabioside	0
	MOL005970	-7.6	Eucalyptol	34365085
	MOL006057	-7.6	Platyconic acid-A Lactone	0
	MOL006060	-7.6	platycoside C	0
	MOL006073	-7.6	Platycodin C	0
	MOL006137	-7.6	1,3,6-trihydroxy-2-methylanthraquinone-3-O-α-rhamnosyl-(1→2)-β-glucoside	57335470
	MOL006150	-7.6	1-acetoxy-6-hydroxy2-methylanthraquinone-3-O-α-rhamnosyl(1→4)-α-glucoside	0
	MOL006318	-7.6	1,3,4,6-tetra-O-galloyl-β-D-glucose	0
	MOL006360	-7.6	3-O-α-L-arabinofuranosyl kaempferol 7-O-α-L-rhamnopyranoside	0
	MOL006411	-7.6	obacunone	0
	MOL006449	-7.6	tinoside	0
	MOL006514	-7.6	Kudinoside B	0
	MOL006517	-7.6	Kudinoside J_qt	0
	MOL006521	-7.6	Kudinoside G	0
	MOL006530	-7.6	ilekudinoside A	0
	MOL006558	-7.6	zigu一glucoside I_qt	0
	MOL006596	-7.6	Glyceollin	0
	MOL006602	-7.6	isokurarinone	0
	MOL006631	-7.6	(2R)-2-(2,4-dihydroxyphenyl)-5,7-dihydroxy-8-[(2S)-2-isopropenyl-5-methylhex-4-enyl]-4-chromanone	1711995
	MOL006769	-7.6	isoquercetrin	0
	MOL006801	-7.6	phyllaemblicacid methyl ester	0
	MOL006822	-7.6	1,6-Di-O-galloyl-glucose	440221
	MOL006824	-7.6	α-amyrin	12358389
	MOL006849	-7.6	[(2R,3S,4R,5R,6S)-4,5-dihydroxy-6-(3,4,5-trihydroxybenzoyl)oxy-2-[(3,4,5-trihydroxybenzoyl)oxymethyl]oxan-3-yl] 3,4,5-trihydroxybenzoate	10077822
	MOL006871	-7.6	cynanchoside c2_qt	0
	MOL006972	-7.6	Pycnamine	0
	MOL006987	-7.6	Cepharanoline	0
	MOL007055	-7.6	9-methyl lithospermate b	0
	MOL007070	-7.6	(6S,7R)-6,7-dihydroxy-1,6-dimethyl-8,9-dihydro-7H-naphtho[8,7-g]benzofuran-10,11-dione	10470747
	MOL007111	-7.6	Isotanshinone II	626354
	MOL007127	-7.6	1-methyl-8,9-dihydro-7H-naphtho[5,6-g]benzofuran-6,10,11-trione	10062187
	MOL007150	-7.6	(6S)-6-hydroxy-1-methyl-6-methylol-8,9-dihydro-7H-naphtho[8,7-g]benzofuran-10,11-quinone	16730071
	MOL007248	-7.6	27-o-(z)-coumaroyloxyursolicacid	0
	MOL007279	-7.6	procyanidin,b	13269088
	MOL007287	-7.6	emodin-8-o-beta-d-glucopyranoside	0
	MOL007308	-7.6	castilliferol	0
	MOL007365	-7.6	galloyl-oxypaeoniflorin	0
	MOL007380	-7.6	mudanpinoic,acid,a	0
	MOL007388	-7.6	(1S,2R,4aS,6aR,6aS,6bR,8aR,10R,11S,12aR,14bS)-10,11-dihydroxy-1,2,6a,6b,9,9,12a-heptamethyl-2,3,4,5,6,6a,7,8,8a,10,11,12,13,14b-tetradecahydro-1H-picene-4a-carboxylic acid	24721200
	MOL007495	-7.6	gypenosidexvii	44584555
	MOL007567	-7.6	5-hydroxy-8-[5-(5-hydroxy-4-keto-7-methoxy-chromen-2-yl)-2-methoxy-phenyl]-7-methoxy-2-(4-methoxyphenyl)chromone	5490003
	MOL007653	-7.6	stigmasterol-3-o-β-d-glucoside	0
	MOL007721	-7.6	Totarol	92783
	MOL007772	-7.6	ajugasterone B	0
	MOL007773	-7.6	clemontanoside C	0
	MOL007777	-7.6	Stigmasta-5,22-dien-3-O-.beta.-D-glucopyranoside	6602508
	MOL007778	-7.6	Plantaginin	5320623
	MOL007803	-7.6	homoplantaginin	0
	MOL007820	-7.6	plantenolic acid	0
	MOL007839	-7.6	azukisaponin	0
	MOL007844	-7.6	3-O-[a-L-rhamnopyranosyl(1→2)-β-D-glucopyra-nosyl(l→2)-β-D-glucuronopyranosyl]-soyasapogenol B_qt	0
	MOL007853	-7.6	3-O-[β-D-glucopyranosyl(1→2)β-D-glucuropyranosyl]-29-O-[β-D-glucopyranosyl(1→6)-β-D-glucopyranosyl]azukisapogenol	0
	MOL007889	-7.6	(3S,6aS,6aS,6bR,8aR,12aR,14aR,14bS)-4,4,6a,6b,8a,11,11,14a-octamethyl-1,2,3,6,6a,7,8,9,10,12,12a,13,14,14b-tetradecahydropicen-3-ol	9932254
	MOL007895	-7.6	2,8-dihydroxy-1,7-dimethyl-6-ethenyl-10,11-dihydrodibenz[b,f]-oxepin	0
	MOL007936	-7.6	rhamnocitrin-3,4'-diglucOside	0
	MOL007979	-7.6	Avicularin	5490064
	MOL008008	-7.6	papyrioside L-Ⅱb	0
	MOL008014	-7.6	paryriogenin B	0
	MOL008017	-7.6	paryriogenin E	0
	MOL008018	-7.6	paryriogenin G	0
	MOL008254	-7.6	Isotetandrine	0
	MOL008457	-7.6	Tetrahydroalstonine	0
	MOL008523	-7.6	sitogenin	0
	MOL008561	-7.6	(2S,2'S,3R,3'R,4R,4'R,5R,5'R)-2,2'-(((2R,3R,4R,5R,6R)-2-(((2S,3R,4R,5R,6R)-2,4-dihydroxy-6-(((2aS,4R,6aS,6bS,8aS,8bS,9S,10R,11aR,12aR,12bR)-10-methoxy-6a,8a,9-trimethyl-10-((R)-3-(((2R,3R,4S,5S,6R)-3,4,5-trihydroxy-6-(hydroxymethyl)tetrahydro-2H-pyra	0
	MOL008572	-7.6	(2aS,2'R,4R,5'R,6aS,6bS,8aS,8bS,9S,11aR,12aR,12bR)-4-(((2R,3R,4S,5S,6R)-5-(((2R,3R,4S,5S,6R)-4,5-dihydroxy-6-(hydroxymethyl)-3-(((2S,3R,4R,5S,6R)-3,4,5-trihydroxy-6-(hydroxymethyl)tetrahydro-2H-pyran-2-yl)oxy)tetrahydro-2H-pyran-2-yl)oxy)-3-hydroxy-6-(h	0
	MOL008574	-7.6	(2aS,2'R,4R,6aS,6bS,8aR,8bS,9S,11aR,12aR,12bR)-4-ethoxy-2a,8a,9-trimethylicosahydrospiro[naphtho[2',1':4,5]indeno[2,1-b]furan-10,2'-pyran]-8(2H)-one	0
	MOL008592	-7.6	Automatically Name	0
	MOL008596	-7.6	balsaminone A	0
	MOL008634	-7.6	corycavine	0
	MOL008648	-7.6	acetylcorynoline	0
	MOL008752	-7.6	Dihydroverticillatine	0
	MOL008789	-7.6	Hernandezine	0
	MOL008826	-7.6	105437-18-1	0
	MOL008884	-7.6	lithospermic acid	0
	MOL009011	-7.6	(+)-Pinoresinol-.beta.-D-glucoside	486614
	MOL009060	-7.6	(+)-catechin-5-O-β-D-glucopyranoside	0
	MOL009080	-7.6	davallioside B_qt	0
	MOL009083	-7.6	ferna-7-9(11)-diene	13857712
	MOL009111	-7.6	hippomanin A	0
	MOL009124	-7.6	tellimagrandin I	0
	MOL009188	-7.6	mahuannin K	0
	MOL009218	-7.6	neokadsuranic acid B	0
	MOL009235	-7.6	angusifolin B	0
	MOL009289	-7.6	Calycosin-7-O-beta-D-glucopyranoside	0
	MOL009295	-7.6	Flazin	5377686
	MOL009378	-7.6	didehydroprotostemonine	0
	MOL009393	-7.6	isoprotostemonine	0
	MOL009409	-7.6	oxystemoninine	0
	MOL009428	-7.6	stemoenonine	0
	MOL009436	-7.6	stemotinine	0
	MOL009443	-7.6	tuberostemoenone	0
	MOL009479	-7.6	deacylbrownioside_qt	0
	MOL009546	-7.6	deacetyl asperuloside	0
	MOL009585	-7.6	Imperialine-β-N-oxide	0
	MOL009588	-7.6	Korseveriline	0
	MOL009589	-7.6	Korseverinine	0
	MOL009713	-7.6	Soyasaponin	0
	MOL009740	-7.6	Sapogenol C	3083637
	MOL009742	-7.6	Soyasapogenol E	0
	MOL009759	-7.6	sibiricoside A	0
	MOL009885	-7.6	Gypenoside LII	0
	MOL009908	-7.6	Gypenoside LVII	0
	MOL009929	-7.6	Gypenoside LXXIX	0
	MOL009939	-7.6	Gypenoside XIII	0
	MOL009951	-7.6	Gypenoside XLVI	0
	MOL009974	-7.6	Gypenoside XXX	0
	MOL010141	-7.6	mogroside ⅣE_qt	0
	MOL010197	-7.6	verticinone	0
	MOL010230	-7.6	ST5330591	2723613
	MOL010248	-7.6	gamma-carotene	0
	MOL010264	-7.6	Lichesterol	5281329
	MOL010361	-7.6	sapindoside E_qt	0
	MOL010368	-7.6	Yinyanghuo A	0
	MOL010373	-7.6	yibeinoside A	0
	MOL010376	-7.6	Yibeinoside B_qt	0
	MOL010385	-7.6	3-o-beta-d-glucopyranosyl-(1-2)-[beta-d-xylopyranosyl-(1-3)]-beta-d-glucopyranosyl-(1-4)-galactopyranosyl-25(S)-spirost-5(6)-en-3beta-ol_qt	0
	MOL010425	-7.6	oxyavicine	0
	MOL010447	-7.6	aster saponin G	0
	MOL010543	-7.6	acaciin	0
	MOL010565	-7.6	Carmine	14749
	MOL010594	-7.6	(2S,3S)-2-(4-hydroxy-3-methoxy-phenyl)-5-methoxy-3-methylol-2,3-dihydropyrano[5,6-h][1,4]benzodioxin-9-one	11982428
	MOL010633	-7.6	kulolactone	0
	MOL010639	-7.6	nimbolin B	0
	MOL010663	-7.6	salannin	0
	MOL010950	-7.6	cyclamin_qt	0
	MOL010995	-7.6	3beta-O-(alpha-L-rhamnopyranosyl-(1-2)-beta-D-glucopyranosyl-(1-4)-alpha-L-arabinopynanosyl)cyclamiretin A_qt	0
	MOL011041	-7.6	16-Propoxystrychnine	0
	MOL011097	-7.6	3,5,4'-trihydroxy-6,7-methylenedioxyflavone-3-O-β-D-glucopyranoside	0
	MOL011133	-7.6	12-Deacetylganoderic acid H	0
	MOL011161	-7.6	ergosta-7,22-dien-2β,3α,9α-triol	0
	MOL011173	-7.6	ganoderenic acid a	0
	MOL011186	-7.6	Ganoderic acid C6	0
	MOL011274	-7.6	Lucidenic acid D2	23247891
	MOL011378	-7.6	semiaquilegoside A_qt	0
	MOL011412	-7.6	gypenosideIII	0
	MOL011453	-7.6	20-(S)-Ginsenoside-Rg3	0
	MOL011482	-7.6	Daturameteline M	0
	MOL011500	-7.6	Daturameteline B	0
	MOL011508	-7.6	Daturameteloside F_qt	0
	MOL011521	-7.6	KaemPferol-3	0
	MOL011616	-7.6	Fortunellin	5317385
	MOL011623	-7.6	1-[2-(3,4-dihydroxyphenyl)-1-carboxy]ethoxycarbonyl-2-(3,4-dihydroxyphenyl)-3-[2-(3,4-dihydroxyphenyl)-1-methoxycarbonyl]ethoxycarbonyl-7,8-dihydrox-1,2-dihydronaphthalene	0
	MOL011624	-7.6	1-[2-(3,4-dihydroxyphenyl)-1-carboxy]ethoxycarbonyl-2-(3,4-dihydroxyphenyl)-7,8-dihydroxy-1,2-dihydronaphthalene-3-carboxylic acid	0
	MOL011688	-7.6	[(2R,3S,4S,5R,6S)-3,4,5-trihydroxy-6-[3-(4-hydroxyphenyl)-6-methoxy-4-oxochromen-7-yl]oxyoxan-2-yl]methyl acetate	10228095
	MOL011689	-7.6	6'-O-malonyldaidzin	0
	MOL011789	-7.6	kaikasaponin I	0
	MOL011813	-7.6	(3S,4aR,6aR,6bS,8S,8aS,11R,12S,12aS,14aR,14bR)-4,4,6a,6b,8a,11,12,14b-octamethyl-2,3,4a,5,6,7,8,9,10,11,12,12a,14,14a-tetradecahydro-1H-picene-3,8-diol	9803424
	MOL011823	-7.6	(3S,4aR,6aR,6aR,6bR,8S,8aS,9S,12S,12aR,14aR,14bR)-4,4,6a,6b,8a,11,12,14b-octamethyl-2,3,4a,5,6,6a,7,8,9,12,12a,13,14,14a-tetradecahydro-1H-picene-3,8,9-triol	9890380
	MOL011885	-7.6	lysiflavonoide A	0
	MOL011891	-7.6	lysimachigenoside D_qt	0
	MOL011986	-7.6	12beta-hydroxylcimigenol,3-o-alpha-l-arabinopyranoside_qt	0
	MOL011987	-7.6	15-O-acetylacerinol	0
	MOL012056	-7.6	cimicifugoside h-1	0
	MOL012061	-7.6	cimigenol-3-O-beta-d-galactopyranoside	0
	MOL012084	-7.6	12beta-hydroxycimigenol_qt	0
	MOL012096	-7.6	myricadiol	0
	MOL012141	-7.6	Caribine	0
	MOL012176	-7.6	3β-hydroxy-12-oxo-13Hα-olean-28,19β-olide	0
	MOL012260	-7.6	(3S,8S,9S,10R,13R,14S,17R)-10,13-dimethyl-17-[(E,1R,4R)-1,4,5-trimethylhex-2-enyl]-2,3,8,9,11,12,14,15,16,17-decahydro-1H-cyclopenta[a]phenanthren-3-ol	20831068
	MOL012275	-7.6	3-O-β-D-glucopyranosyl oleanolic acid	0
	MOL012277	-7.6	3-O-(β-D-glucopyranosiduronic acid) oleanolic acid	14314623
	MOL012291	-7.6	isocyasterone	0
	MOL012335	-7.6	ginsenoside Rg3_qt	0
	MOL012339	-7.6	ginsenoside Rs1_qt	0
	MOL012396	-7.6	3,4-Methylenedioxy-10-hydroxy aristololactam	0
	MOL012444	-7.6	poriol	0
	MOL012474	-7.6	achybidensaponin,ii_qt	0
	MOL012476	-7.6	achyranthoside Ⅱ	0
	MOL012578	-7.6	Cinchonain 1a	442675
	MOL012581	-7.6	(4S,8R,9R)-4,8-bis(3,4-dihydroxyphenyl)-5,9-dihydroxy-4,8,9,10-tetrahydro-3H-pyrano[6,5-h]chromen-2-one	21676382
	MOL012583	-7.6	(2R,3R,4S)-2-(3,4-dihydroxyphenyl)-4-(2,4,6-trihydroxyphenyl)chroman-3,5,7-triol	14009028
	MOL012599	-7.6	kaempferol-3-O-α-L-(2〞,4〞-di-E-p-coumaroyl)-rhamnoside	0
	MOL012600	-7.6	Kaemp-7-neohesperidoside	5483905
	MOL012646	-7.6	(2S,3R,4S,5S,6R)-2-[(2S)-2-[(3S,5R,8R,9R,10R,12R,13R,14R,17S)-3-[(2R,3R,4S,5S,6R)-4,5-dihydroxy-6-(hydroxymethyl)-3-[(2R,3R,4S,5S,6R)-3,4,5-trihydroxy-6-(hydroxymethyl)oxan-2-yl]oxyoxan-2-yl]oxy-12-hydroxy-4,4,8,10,14-pentamethyl-2,3,5,6,7,9,11,12,13,15,1	9898279
	MOL012669	-7.6	majoroside F2	0
	MOL012690	-7.6	kuwanon A	44258296
	MOL012746	-7.6	sanggenol L	0
	MOL012763	-7.6	ursane	9548870
	MOL012770	-7.6	28-O-β-D-glucopyranosyl-3β,7β-dihydroxy-lup-20(29)-en-28-oate	0
	MOL012915	-7.6	dauricline	0
	MOL012951	-7.6	PCG	24316
	MOL012964	-7.6	zizyphus saponin I	0
	MOL012970	-7.6	2α-hydroxyursolic acid	0
	MOL012983	-7.6	Jujubasaponin VI	0
	MOL012991	-7.6	Jujuboside	0
	MOL012993	-7.6	Mauritine A	0
	MOL013039	-7.6	6' -Sinapoylspinosin	0
	MOL013081	-7.6	Decussine	0
	MOL013218	-7.6	Strictosamide	0
	MOL013231	-7.6	Chebulagic acid	0
	MOL013236	-7.6	yamogenin acetate	0
	MOL013342	-7.6	Stypandrol	188516
	MOL013369	-7.6	Maysin	0
	MOL013409	-7.6	euphoscopin G	0
	MOL013419	-7.6	persicogenin-3'glucoside	0
	MOL013431	-7.6	3,8-di-C-glucosylapigenin	0
	MOL000010	-7.5	Rhoifolin	5282150
	MOL000084	-7.5	beta-daucosterol	0
	MOL000157	-7.5	[(2R,3S,4S,5R,6R)-6-[2-(3,4-dihydroxyphenyl)ethoxy]-4,5-dihydroxy-2-(hydroxymethyl)oxan-3-yl] (E)-3-(3,4-dihydroxyphenyl)prop-2-enoate	10457774
	MOL000159	-7.5	[(2R,3R,4S,5R,6R)-6-[2-(3,4-dihydroxyphenyl)ethoxy]-3,5-dihydroxy-4-[(2R,3S,4S,5S,6R)-3,4,5-trihydroxy-6-methyl-tetrahydropyran-2-yl]oxy-tetrahydropyran-2-yl]methyl (E)-3-(3,4-dihydroxyphenyl)prop-2-enoate	16755425
	MOL000297	-7.5	Tumulosic acid	12314446
	MOL000357	-7.5	Sitogluside	5742590
	MOL000368	-7.5	viscumneosideIV	0
	MOL000369	-7.5	viscumneosideV	0
	MOL000374	-7.5	5'-hydroxyiso-muronulatol-2',5'-di-O-glucoside	0
	MOL000402	-7.5	astragalosideI_qt	0
	MOL000466	-7.5	6,8-di-C-α-L-arabinosylapigenin	21576179
	MOL000566	-7.5	galloylhyperin	0
	MOL000574	-7.5	3,3'-digalloylprocyanidin	0
	MOL000726	-7.5	Morindin	5319896
	MOL000746	-7.5	Macranthoidin A_qt	0
	MOL000801	-7.5	5alpha,8alpha-epidioxy-(22e,24r)-ergosta-6,22-dien-3beta-ol	0
	MOL000802	-7.5	27625-48-5	6441416
	MOL000807	-7.5	polyporoid,b	44450001
	MOL000855	-7.5	alisol B monoacetate	0
	MOL000862	-7.5	[(1S,3R)-1-[(2R)-3,3-dimethyloxiran-2-yl]-3-[(5R,8S,9S,10S,11S,14R)-11-hydroxy-4,4,8,10,14-pentamethyl-3-oxo-1,2,5,6,7,9,11,12,15,16-decahydrocyclopenta[a]phenanthren-17-yl]butyl] acetate	14036811
	MOL001079	-7.5	lupeone	0
	MOL001087	-7.5	3-epi-α-amirin	0
	MOL001091	-7.5	lupeol	0
	MOL001239	-7.5	epilupeol acetate	40884505
	MOL001243	-7.5	3alpha-Hydroxy-olean-12-en-24-oic-acid	637234
	MOL001265	-7.5	acetyl-alpha-boswellic,acid	15181201
	MOL001342	-7.5	GA121-isolactone	0
	MOL001458	-7.5	coptisine	0
	MOL001474	-7.5	sanguinarine	0
	MOL001548	-7.5	6'-sinapoylspinosin	0
	MOL001558	-7.5	sesamin	72307
	MOL001601	-7.5	1,2,5,6-tetrahydrotanshinone	0
	MOL001797	-7.5	(2S)-7-[(2S,3R,4S,5S,6R)-4,5-dihydroxy-6-methylol-3-[(2S,3R,4R,5R,6S)-3,4,5-trihydroxy-6-methyl-tetrahydropyran-2-yl]oxy-tetrahydropyran-2-yl]oxy-5-hydroxy-2-(3-hydroxy-5-methoxy-phenyl)chroman-4-one	24721685
	MOL001829	-7.5	Glucofrangulin	99649
	MOL001885	-7.5	Cymarin	0
	MOL001900	-7.5	Pulchinenoside A_qt	21672692
	MOL001905	-7.5	3β-hydroxy-oleana-11,13(18)-dien-28-oic acid?	15226483
	MOL001915	-7.5	paeonoside	0
	MOL001965	-7.5	Dauricine (8CI)	73400
	MOL001980	-7.5	Helixin	73296
	MOL002244	-7.5	Chrysophanol glucoside	6324923
	MOL002248	-7.5	Gallic acid-4-O-(6'-O-galloyl)-glucoside	11968477
	MOL002251	-7.5	Mutatochrome	0
	MOL002257	-7.5	Physcion-8-O-beta-D-glucopyranoside	11968838
	MOL002304	-7.5	Glycerite	0
	MOL002324	-7.5	3-[2-sulfooxyimino-2-[(2S,3R,4S,5S,6R)-3,4,5-trihydroxy-6-(hydroxymethyl)oxan-2-yl]sulfanylethyl]indole-1-sulfonic acid	6602379
	MOL002359	-7.5	6-Hydroxy-musizin-8-O-beta-D-glucoside	100753
	MOL002360	-7.5	Pulmatin	442731
	MOL002418	-7.5	hetisine	0
	MOL002473	-7.5	ZINC04081584	7092657
	MOL002549	-7.5	NSC666680	380898
	MOL002639	-7.5	Obamegine	0
	MOL002661	-7.5	nomilin	0
	MOL002669	-7.5	Campesteryl ferulate	0
	MOL002742	-7.5	LUT	448437
	MOL002749	-7.5	6-hydroxykaempferol-3,6,7-tri-O-beta-D-glucoside	0
	MOL002760	-7.5	Hydroxybenzoyl-coumaricanhydride	0
	MOL002806	-7.5	CUCURBITACIN I	0
	MOL002935	-7.5	Baicalin	0
	MOL002945	-7.5	2,3-didehydro-2',7-dihydroxy-4'-methoxy-3(2',7-dihydroxy-4'-methoxyisoflavan-5'-yl)flavan	0
	MOL002956	-7.5	7,3',4'-Trihydroxyflavone	5322065
	MOL003000	-7.5	Stevein	5321501
	MOL003010	-7.5	quercetin-3-o-beta-D-glu	0
	MOL003151	-7.5	gentirigeoside E_qt	0
	MOL003168	-7.5	trifloroside_qt	0
	MOL003189	-7.5	WILFORLIDE A	0
	MOL003192	-7.5	Triptonide	0
	MOL003194	-7.5	3-epikatonic acid	0
	MOL003204	-7.5	(2S,4S,4aR,6aR,6aS,6bR,8aR,10S,12aR,14bS)-4,10-dihydroxy-2,4a,6a,6b,9,9,12a-heptamethyl-1,3,4,5,6,6a,7,8,8a,10,11,12,13,14b-tetradecahydropicene-2-carboxylic acid	21594203
	MOL003205	-7.5	Wilforlide A	0
	MOL003207	-7.5	Celacinnine	0
	MOL003221	-7.5	Regelindiol A	0
	MOL003222	-7.5	Salazinic acid	0
	MOL003248	-7.5	Triptonoterpene	0
	MOL003284	-7.5	caleolarioside A	0
	MOL003309	-7.5	plantainoside A	0
	MOL003378	-7.5	1,3,8,9-tetrahydroxybenzofurano[3,2-c]chromen-6-one	5489605
	MOL003402	-7.5	demethylwedelolactone	0
	MOL003426	-7.5	Salipurposide	0
	MOL003641	-7.5	Soyasapogenol B	115012
	MOL003642	-7.5	Soyasaponin II	443614
	MOL003649	-7.5	7-hydroxy-2-(4-hydroxyphenyl)-8-[(2S,3R,4R,5S,6R)-3,4,5-trihydroxy-6-methylol-tetrahydropyran-2-yl]chromone	21721991
	MOL003695	-7.5	Cistanoside A	0
	MOL003726	-7.5	rehmannioside B	0
	MOL003733	-7.5	6-O-vanilloylajugol	0
	MOL003826	-7.5	esculentoside M	0
	MOL003848	-7.5	Insularine	0
	MOL003859	-7.5	Moracin E	5319888
	MOL003861	-7.5	Moracin G	5319890
	MOL003888	-7.5	methylprotodioscin	0
	MOL003910	-7.5	evobioside_qt	12305991
	MOL004013	-7.5	1,3,4-Tridehydrofangchinolium hydroxide	0
	MOL004016	-7.5	Exaltolide	0
	MOL004022	-7.5	Methyl 3,3,6-tri-O-galloyl-beta-D-glucopyranoside	0
	MOL004159	-7.5	curculigosaponin L	0
	MOL004229	-7.5	Spallidamine	0
	MOL004230	-7.5	stylopine	0
	MOL004371	-7.5	rouhuoside	0
	MOL004373	-7.5	Anhydroicaritin	5318980
	MOL004398	-7.5	3,5,7-Trihydroxy-4'-methoxyl-8-prenylflavone-3-O-rhamnopyranoside	5488822
	MOL004417	-7.5	epimedoside	0
	MOL004422	-7.5	Hexandraside E	0
	MOL004433	-7.5	3-[(2S,3R,4S,5S,6R)-4,5-dihydroxy-6-methylol-3-[(2S,3R,4R,5R,6S)-3,4,5-trihydroxy-6-methyl-tetrahydropyran-2-yl]oxy-tetrahydropyran-2-yl]oxy-5,7-dihydroxy-2-(4-hydroxyphenyl)-8-(3-methylbut-2-enyl)chromone	5318411
	MOL004438	-7.5	korepimedoside A	0
	MOL004597	-7.5	3'-O-acetylsaikosaponin b2	0
	MOL004624	-7.5	Longikaurin A	0
	MOL004625	-7.5	Longispinogenin 3-O-beta-D-glucuronopyranoside	0
	MOL004633	-7.5	Saikogenin F	0
	MOL004636	-7.5	Saikosaponin B	0
	MOL004702	-7.5	saikosaponin c_qt	0
	MOL004792	-7.5	nodakenin	73191
	MOL004820	-7.5	kanzonols W	15380912
	MOL004822	-7.5	(E)-1-(2,4-dihydroxyphenyl)-3-[4-hydroxy-3-(3-methylbut-2-enyl)phenyl]prop-2-en-1-one	11099375
	MOL004838	-7.5	8-(6-hydroxy-2-benzofuranyl)-2,2-dimethyl-5-chromenol	10542808
	MOL004844	-7.5	glabrol	0
	MOL004851	-7.5	Licoflavone	5319000
	MOL004860	-7.5	licorice glycoside E	0
	MOL004862	-7.5	(2R)-2-[3,4-dihydroxy-5-(3-methylbut-2-enyl)phenyl]-5,7-dihydroxy-8-(3-methylbut-2-enyl)chroman-4-one	14539875
	MOL004885	-7.5	licoisoflavanone	0
	MOL004896	-7.5	licorice-saponin J2	0
	MOL004903	-7.5	liquiritin	503737
	MOL004924	-7.5	(-)-Medicocarpin	23724664
	MOL004926	-7.5	4H-1-Benzopyran-4-one, 2-(4-(beta-D-glucopyranosyloxy)phenyl)-2,3-dihydro-5,7-dihydroxy-, (2S)-	157745
	MOL004930	-7.5	Uralenol	5315126
	MOL004933	-7.5	uralsaponin B	0
	MOL004945	-7.5	(2S)-7-hydroxy-2-(4-hydroxyphenyl)-8-(3-methylbut-2-enyl)chroman-4-one	193679
	MOL004951	-7.5	Isoliquiritin	0
	MOL004955	-7.5	isoglabrolide	0
	MOL004956	-7.5	Isoononin	5318619
	MOL004975	-7.5	3β-formylglabrolide	0
	MOL004980	-7.5	Inflacoumarin A	5318437
	MOL005001	-7.5	Gancaonin H	5481949
	MOL005065	-7.5	chebulagic acid	0
	MOL005066	-7.5	chebulinic acid	0
	MOL005070	-7.5	mallotusinic acid	0
	MOL005071	-7.5	Spiraein	5320844
	MOL005095	-7.5	fagaridine	5318563
	MOL005149	-7.5	Isonuezhenide	0
	MOL005183	-7.5	3b-(p-hydroxy-trans-cinnamoyloxy)-2a-hydroxy-oleanolic acid	0
	MOL005192	-7.5	Manghaslin	0
	MOL005247	-7.5	gibberellin A26	0
	MOL005258	-7.5	Castasterone	133534
	MOL005331	-7.5	ginsenoside Rb1	0
	MOL005335	-7.5	Gypenoside LXIX	0
	MOL005336	-7.5	ginsenoside-Rc	0
	MOL005350	-7.5	Ginsenoside-Rs2	0
	MOL005437	-7.5	(2S,3S,3aR)-3a-allyl-2-(1,3-benzodioxol-5-yl)-5-methoxy-3-methyl-2,3-dihydrobenzofuran-6-one	10903924
	MOL005542	-7.5	camptothin A	0
	MOL005560	-7.5	olean-13(18)-ene	0
	MOL005583	-7.5	yuanhuatin	0
	MOL005653	-7.5	Glycoside H2	0
	MOL005692	-7.5	NERIDIENONE A	100630
	MOL005754	-7.5	1,8-bis(hydroxybenzyl)-4-methoxyphenanthrene-2,7-diol	14863079
	MOL005774	-7.5	1-(2,7-dihydroxy-4-methoxy-9,10-dihydrophenanthren-1-yl)-4-methoxy-9,10-dihydrophenanthrene-2,7-diol	11317652
	MOL005776	-7.5	1-(2,7-dihydroxy-4-methoxy-1-phenanthryl)-4-methoxyphenanthrene-2,7-diol	9982511
	MOL005807	-7.5	sen-byakangelicol	0
	MOL005922	-7.5	Acanthoside B	443024
	MOL005937	-7.5	kaikasaponinI	0
	MOL006004	-7.5	3'-a-O-Polygalacin D	0
	MOL006025	-7.5	Deapio-Platycodin-D3	0
	MOL006072	-7.5	Platycodin A	0
	MOL006091	-7.5	Erythrodiol	101761
	MOL006094	-7.5	quercetin glucoside	0
	MOL006098	-7.5	faradiol	0
	MOL006102	-7.5	ursendiol	0
	MOL006136	-7.5	1,3,6-trihydroxy-2-methylanthraquinone-3-O-(6'-O-acetyl)-α-rhamnosyl(1→2)-β-glucoside	0
	MOL006138	-7.5	2-Methyl-1,3,6-trihydroxy-9,10-anthraqui-none-3-O-beta-D-xylosyl-(1-->2)-beta-D-(6'-O-acetyl) glucoside	5319802
	MOL006204	-7.5	antheraxanthin	0
	MOL006220	-7.5	neoxanthin	0
	MOL006369	-7.5	3-caffeoyl-5-feruoyl-quinic,acid	0
	MOL006371	-7.5	3-feruoyl-4-caff,eoylquinicacid	0
	MOL006381	-7.5	51744-55-9	0
	MOL006382	-7.5	THALPHENINE	0
	MOL006456	-7.5	1-[(beta-D-Glucopyranosyl-(1-6)-O-beta-D-glucopyranosyl-(1-3)-O-beta-D-glucopyranosl (1-6)-O-beta-D-glucopyranosyl)oxy]-8-hydrox3-methyl-9,10-anthraquinone	0
	MOL006473	-7.5	Cassiaside A	164146
	MOL006492	-7.5	torachrysone,8-o-[beta-d-glucopyranosyl(1-3)-o-beta-d-glucopyranosyl(1-6)-o-beta-d-glucopyranoside]	0
	MOL006500	-7.5	(1S,2R,4aS,6aS,6aR,6bR,8aR,10R,11R,12aR,14bS)-10,11-dihydroxy-1,2,6a,6b,12a-pentamethyl-9-methylene-2,3,4,5,6,6a,7,8,8a,10,11,12,13,14b-tetradecahydro-1H-picene-4a-carboxylic acid	10647480
	MOL006507	-7.5	Ilekudinoside F_qt	0
	MOL006512	-7.5	Kudinoside A	0
	MOL006528	-7.5	ilekudinol A	0
	MOL006536	-7.5	[(2S,3R,4S,5S,6R)-3,4,5-trihydroxy-6-(hydroxymethyl)oxan-2-yl] (1R,2R,4aS,6aR,6aS,6bR,8aR,9R,10S,12aR,14bS)-1,10-dihydroxy-9-(hydroxymethyl)-1,2,6a,6b,9,12a-hexamethyl-2,3,4,5,6,6a,7,8,8a,10,11,12,13,14b-tetradecahydropicene-4a-carboxylate	14286954
	MOL006549	-7.5	Acteoside_qt	0
	MOL006599	-7.5	3,4',5-Trihydroxy-7-methoxy-8-isopente-nylflavone	5322079
	MOL006604	-7.5	(2S)-7-hydroxy-2-(4-hydroxyphenyl)-5-methoxy-8-(3-methylbut-2-enyl)chroman-4-one	9928523
	MOL006644	-7.5	sophoraflavoside IV	0
	MOL006689	-7.5	mimengoside,d	0
	MOL006694	-7.5	mimengoside,g	0
	MOL006697	-7.5	β-amyrenone	0
	MOL006717	-7.5	celosin B	0
	MOL006740	-7.5	ginsenoside- Rb2	0
	MOL006743	-7.5	Gypenoside XV	0
	MOL006758	-7.5	delta7-Stigmastenol-3-O-beta-D-glucoside	3035540
	MOL006783	-7.5	apigenin-7-O-(6'-butyryl-beta-glucopyranoside)	0
	MOL006803	-7.5	phyllaemblicin B	0
	MOL006808	-7.5	Phyllanemblinin C	0
	MOL006817	-7.5	tercatain	0
	MOL007042	-7.5	3-epicorosolic,acid	15917998
	MOL007046	-7.5	3beta-Hydroxytanshinone IIA	5318350
	MOL007071	-7.5	przewaquinone f	0
	MOL007087	-7.5	carnosol	0
	MOL007088	-7.5	cryptotanshinone	160254
	MOL007099	-7.5	dihydroisotanshinoneⅠ	11778300
	MOL007113	-7.5	lithospermic acid	6441498
	MOL007121	-7.5	miltipolone	0
	MOL007122	-7.5	Miltirone	160142
	MOL007126	-7.5	przewalskin	0
	MOL007133	-7.5	salviacoccin	0
	MOL007174	-7.5	5-hydroxy-2-(3-hydroxy-4-methoxyphenyl)-7-[(2S,3R,4S,5S,6R)-3,4,5-trihydroxy-6-(hydroxymethyl)oxan-2-yl]oxychromen-4-one	11016019
	MOL007180	-7.5	vitamin-e	3476
	MOL007186	-7.5	Karounidiol	159490
	MOL007188	-7.5	quercetin-5-o-β-d-glucoside	52946987
	MOL007251	-7.5	pedunculoside	0
	MOL007285	-7.5	Procyanidol C1	169853
	MOL007303	-7.5	madecassoside_qt	0
	MOL007317	-7.5	asiaticoside,f	0
	MOL007352	-7.5	23-o-acetyl-12β-hydroxysolasodine	0
	MOL007450	-7.5	SILYBIN	31553
	MOL007489	-7.5	notoginsenosider3	0
	MOL007491	-7.5	notoginsenosider4	0
	MOL007558	-7.5	(E)-hordenine-O-[6-O-(4-hydroxycinnamoyl)-β-D-glucopyranosyl]-(1-3)-α-L-rhamnopyranoside	0
	MOL007564	-7.5	(E)-hordenine-[6-O-(4-hydroxycinnamoyl)-β-D-glucopyranosyl]-(1→3)-α-L-rhamnopyranoside	0
	MOL007638	-7.5	macrostemonoside d	0
	MOL007641	-7.5	macrostemonoside f	0
	MOL007667	-7.5	6'-O-cinnamoylharpagirle	0
	MOL007683	-7.5	abridin	0
	MOL007792	-7.5	Isomartynoside	6476337
	MOL007810	-7.5	[(2R,3R,4S,5R,6R)-6-[2-(3,4-dihydroxyphenyl)ethoxy]-3,5-dihydroxy-4-[(2S,3R,4S,5S,6R)-3,4,5-trihydroxy-6-(hydroxymethyl)oxan-2-yl]oxyoxan-2-yl]methyl (E)-3-(3,4-dihydroxyphenyl)prop-2-enoate	9986606
	MOL007843	-7.5	3-O-[a-L-rhamnopyranosyl(1→2)-β-D-glucopyra-nosyl(l→2)-β-D-glucuronopyranosyl]-soyasapogenol B	0
	MOL007857	-7.5	triterpenoidsaponin	0
	MOL007939	-7.5	diosbulbin B	0
	MOL007993	-7.5	(1S,4aR,6aR,6aS,6bR,8aR,10S,12aR,14bS)-1-hydroxy-2,2,6a,6b,9,9,12a-heptamethyl-10-[(2S,3R,4S,5R)-3,4,5-trihydroxyoxan-2-yl]oxy-1,3,4,5,6,6a,7,8,8a,10,11,12,13,14b-tetradecahydropicene-4a-carboxylic acid	21770233
	MOL008072	-7.5	yadanzigan _qt	0
	MOL008105	-7.5	yadanzioside P	0
	MOL008109	-7.5	yadanziolide D	0
	MOL008125	-7.5	trans-ferul0ylsigmastenol	0
	MOL008135	-7.5	3,4-di-O-caffeoylquinic acid	0
	MOL008209	-7.5	Deoxycamptothecine	0
	MOL008436	-7.5	Kaempferol-7-rhamnoside	25079965
	MOL008499	-7.5	(25R)-Spirost-5-en-3β-ol acetate	0
	MOL008513	-7.5	apigenin-6-xyloside-8-glucoside	0
	MOL008514	-7.5	Carpaine	0
	MOL008529	-7.5	(4aS,6aR,6aS,6bR,8aS,10R,12aR,14bS)-10-hydroxy-2,2,6a,6b,9,9,12a-heptamethyl-1,3,4,5,6,6a,7,8,8a,10,11,12,13,14b-tetradecahydropicene-4a-carboxylic acid	11869662
	MOL008541	-7.5	Purpurea glycoside B	0
	MOL008542	-7.5	Gitoxigenin	348482
	MOL008545	-7.5	Purpureaglykosid A	0
	MOL008591	-7.5	(2aR,2'R,4R,5'R,6aS,6bS,8aS,8bR,9S,11aS,12aR,12bR)-4-hydroxy-5',6a,8a,9-tetramethylicosahydrospiro[naphtho[2',1':4,5]indeno[2,1-b]furan-10,2'-pyran]-8(2H)-one	0
	MOL008630	-7.5	11-epicorynoline	0
	MOL008641	-7.5	Norsanguinarine	0
	MOL008683	-7.5	alpha-Solamarine_qt	0
	MOL008781	-7.5	2'-northaliphylline	0
	MOL008813	-7.5	Thalifaberine	159246
	MOL008817	-7.5	thalifaricine	10484580
	MOL008835	-7.5	3-[2-[[3-(2-carboxyethyl)-4-methyl-5-[(E)-(4-methyl-5-oxo-3-vinyl-2-pyrrolylidene)methyl]-1H-pyrrol-2-yl]methyl]-4-methyl-5-[(Z)-(3-methyl-5-oxo-4-vinyl-2-pyrrolylidene)methyl]-1H-pyrrol-3-yl]propanoic acid	5799469
	MOL008841	-7.5	Taurocholate	6675
	MOL008848	-7.5	GCH	10140
	MOL008889	-7.5	5,7-dihydroxy-2-(4-hydroxyphenyl)-8-[(2R,3R,4R,5S,6R)-3,4,5-trihydroxy-6-methylol-tetrahydropyran-2-yl]chromone	9910645
	MOL008919	-7.5	(2S,6S,7aR)-2-[(1E,3E,5E,7E,9E,11E,13E,15E)-16-[(4S)-4-hydroxy-2,6,6-trimethyl-1-cyclohexenyl]-1,5,10,14-tetramethylhexadeca-1,3,5,7,9,11,13,15-octaenyl]-4,4,7a-trimethyl-2,5,6,7-tetrahydrobenzofuran-6-ol	20054869
	MOL009040	-7.5	harpagoside	5281542
	MOL009073	-7.5	Procyanidin D	13269089
	MOL009079	-7.5	davallioside B	0
[truncated: 10,980 more rows]
